# Supplementary material
Source: ML conference proceedings conference paper supplement (https://openreview.net/forum?id=5OLcPQaYTVg)
Supplement: supplementary_material [file attachment]

---

# Learning Predictions for Algorithms with Predictions

---

**Mikhail Khodak**  
Carnegie Mellon University  
khodak@cmu.edu

**Maria-Florina Balcan**  
Carnegie Mellon University  
ninamf@cs.cmu.edu

**Ameet Talwalkar**  
Carnegie Mellon University  
talwalkar@cmu.edu

**Sergei Vassilvitskii**  
Google Research - New York  
sergeiv@google.com

## Abstract

A burgeoning paradigm in algorithm design is the field of *algorithms with predictions*, in which algorithms can take advantage of a possibly-imperfect prediction of some aspect of the problem. While much work has focused on using predictions to improve competitive ratios, running times, or other performance measures, less effort has been devoted to the question of how to obtain the predictions themselves, especially in the critical online setting. We introduce a general design approach for algorithms that learn predictors: (1) identify a functional dependence of the performance measure on the prediction quality and (2) apply techniques from online learning to learn predictors, tune robustness-consistency trade-offs, and bound the sample complexity. We demonstrate the effectiveness of our approach by applying it to bipartite matching, ski-rental, page migration, and job scheduling. In several settings we improve upon multiple existing results while utilizing a much simpler analysis, while in the others we provide the first learning-theoretic guarantees.

## 1 Introduction

Algorithms with predictions, a subfield of beyond-worst-case analysis of algorithms [36], aims to design methods that make use of machine-learned predictions in order to reduce runtime, error, or some other performance cost. Mathematically, for some prediction  $\mathbf{x}$ , algorithms in this field are designed such that their cost  $C_t(\mathbf{x})$  on an instance  $t$  is upper-bounded by some measure  $U_t(\mathbf{x})$  of the quality of the prediction on that instance. The canonical example here is that the cost of binary search on a sorted array of size  $n$  can be improved from  $\mathcal{O}(\log n)$  to  $\leq U_t(\mathbf{x}) = 2 \log \eta_t(\mathbf{x})$ , where  $\eta_t(\mathbf{x})$  is the distance between the true location of a query  $t$  in the array and the location predicted by the predictor  $\mathbf{x}$  [36]. In recent years, algorithms whose cost depends on the quality of possibly imperfect predictions have been developed for numerous important problems, including caching [41, 24, 34], scheduling [30, 43], ski-rental [29, 1, 15], bipartite matching [16], page migration [22], and many more [10, 17, 36].

While there has been a significant effort to develop algorithms that use earned predictions, until very recently [13, 33] there has been less focus on actually *learning* to predict. For example, of the works listed only two on ski-rental [1, 15] and one other [16] show sample complexity guarantees, and none consider the important *online learning* setting, in which problem instances may not come from a fixed distribution. This is in contrast to the related area of data-driven algorithm design [19, 3], which has established techniques such as dispersion [6] and others [8, 11] for deriving learning-theoretic guarantees, leading to end-to-end results encompassing both learning and computation. It is also despite the fact that, as we see in this work, learning even simple predictors is in many cases a non-trivial problem.

We bridge this gap and provide a framework for obtaining learning-theoretic guarantees for algorithms with predictions. In addition to improving sample complexity bounds, we show how to learn the parameters of interest in an setting with low overall regret. We accomplish this using a two-

Table 1: Settings we apply our framework to, new learning algorithms we derive, and their regret.

| Problem                                           | Algorithm with prediction                                                              | Feedback                               | Upper bound (losses)                                                                                                              | Learning algo.                    | Regret                                             |
|---------------------------------------------------|----------------------------------------------------------------------------------------|----------------------------------------|-----------------------------------------------------------------------------------------------------------------------------------|-----------------------------------|----------------------------------------------------|
| Min. weight bipartite matching (3) <sup>*.†</sup> | Hungarian method initialized by dual $\mathbf{x} \in \mathbb{R}^n$                     | Opt. dual $\mathbf{x}^*(\mathbf{c})$   | $\mathcal{O}(\ \mathbf{x} - \mathbf{x}^*(\mathbf{c})\ _1)$                                                                        | Proj. online gradient             | $\mathcal{O}(n\sqrt{T})$                           |
| Online page migration (4) <sup>*</sup>            | Lazy offline optimal for predictions $\{\hat{s}_{[j]} \sim \mathbf{P}_{[j]}\}_{j=1}^n$ | Requests $\{s_{[j]}\}_{j=1}^n$         | $\tilde{\mathcal{O}}\left(\max_{i \in [n]} \mathbb{E}_{\mathbf{P}} \sum_{j=i}^{i+\gamma D} 1_{\hat{s}_{[j]} \neq s_{[j]}}\right)$ | Exponentiated gradient $\times n$ | $\mathcal{O}(n\sqrt{T})$                           |
| Online job scheduling (5) <sup>*</sup>            | Corrected offline optimal for predicted logits $\hat{\mathbf{x}} \in \mathbb{R}^m$     | Opt. weights $\mathbf{w} \in \Delta^m$ | $\mathcal{O}(\ \hat{\mathbf{x}} - \log \mathbf{w}\ _\infty)$                                                                      | Euclidean KT-OCO                  | $\mathcal{O}(\sqrt{mT \log(mT)})$                  |
| Non-clairvoyant job scheduling (6) <sup>‡</sup>   | Preferential round-robin with trade-off parameter $\lambda$                            | Prediction quality $\eta$              | $\min\left\{\frac{1+2\eta/n}{1-\lambda}, \frac{2}{\lambda}\right\}$                                                               | Exponential forecaster            | $\mathcal{O}(\sqrt{T \log T})$                     |
| Ski-rental w. integer days $n \in [N]$ (6)        | Buy if price $b \leq x$ , $\lambda$ trade-off with worst-case approx.                  | Number of ski-days $n$                 | $\frac{\min\{\lambda(b1_{x>b} + n1_{x \leq b}), b, n\}}{1 - (1+1/b)^{-b\lambda}}$                                                 | Exponentiated gradient            | $\mathcal{O}(N\sqrt{T \log(NT)})$                  |
| Ski-rental with $\beta$ -dispersed $n$ (6)        | Buy after $x$ days, $\lambda$ trade-off with worst-case approx.                        | Number of ski-days $n$                 | $\min\left\{\frac{e \min\{n, b\}}{(e-1)\lambda}, \frac{n1_{n \leq x} + (b+x)1_{n > x}}{1-\lambda}\right\}$                        | Exponential forecaster            | $\mathcal{O}(\sqrt{T \log(NT)} + N^2 T^{1-\beta})$ |

<sup>\*</sup> For these problems we also provide new guarantees in the statistical (i.i.d.) setting and for learning linear predictors that take instance features as their inputs.

<sup>†</sup> We also obtain results for its extensions to minimum-weight **b**-matching and other graph algorithms with predictions in Appendices B and D.

<sup>‡</sup> We also provide new guarantees for the problem of learning job permutations in the non-clairvoyant setting in Appendix E.

step approach inspired by recent work on theoretical meta-learning [25], which has been used to derive numerous multi-task learning results by optimizing regret-upper-bounds that encode the task-similarity [31, 32, 9, 26]. As evidenced by our results in Table 1, we believe the following two-step framework below holds similar potential for obtaining guarantees for algorithms with predictions:

1. For a given algorithm, derive a convenient-to-optimize upper bound  $U_t(\mathbf{x})$  on the cost  $C_t(\mathbf{x})$  that depends on both the prediction  $\mathbf{x}$  and information specific to instance  $t$  returned once the algorithm terminates, e.g. the optimum in combinatorial optimization. We find that in many cases such bounds already exist, and the quality of the prediction can be measured by a distance from some ground truth obtained from the output, a quantity that is usually convex and thus learnable.
2. Apply online learning to obtain both regret guarantees against adversarial sequences and sample complexity bounds for i.i.d. instances. We provide pseudo-code for a generic setup in Algorithm 1.

Table 1 summarizes instantiations of our framework on multiple problems. Our approach is designed to be simple-to-execute, leaving much of the difficulty to what the field is already good at: designing algorithms and proving prediction-quality-dependent upper bounds on their costs. Once the latter is accomplished, our framework leverages problem-specific structure to design a customized learning algorithm for each problem, leading to strong regret and sample complexity guarantees. In particular, in multiple settings we improve upon existing results in either sample complexity or generality, and in all cases we are the first to show regret guarantees in the online setting. This demonstrates the usefulness of and need for such a theoretical framework for studying these problems.

We summarize the diverse set of contributions enabled by our theoretical framework below:

1. **Bipartite matching:** Our starting example builds upon the work on **minimum-weight bipartite matching** using the Hungarian algorithm by Dinitz et al. [16]. We show how our framework leads directly to both the first regret guarantees in the online setting and new sample complexity bounds that improve over the previous approach by a factor linear in the number of nodes. In the Appendix we show similar strong improvements for **b**-matching and other graph algorithms.
2. **Page migration:** We next study a more challenging application, **online page migration**, and show how we can adapt the algorithmic guarantee of Indyk et al. [22] into a learnable upper bound for which we can again provide both adversarial and statistical guarantees.
3. **Learning linear maps with instance-feature inputs:** Rather than assume the existence of a strong fixed prediction, it is often more natural to assume each instance comes with features that can be input into a predictor such as a linear map. Our approach yields the first guarantees for learning linear predictors for algorithms with predictions, which we obtain for the two problem settings above and also for **online job scheduling** using makespan minimization [30].
4. **Tuning robustness-consistency trade-offs:** Many bounds for *online* algorithms with predictions incorporate parameterized trade-offs between trusting the prediction or falling back on a worst-case approximation. This suggests the usefulness of tuning the trade-off parameter, which we instantiate on a simple job scheduling problem with a fixed predictor. Then we turn to the more challenging problem of simultaneously tuning the trade-off and learning predictions, which we achieve on two variants of the **ski-rental** problem. For the discrete case we give the only learning-theoretic guarantee, while for the continuous case our bound uses a dispersion assumption [6] that, in the i.i.d. setting, is a strictly weaker assumption than the log-concave requirement of Diakonikolas et al. [15].

## 2 Related work

Algorithms with predictions is a type of beyond-worst-case analysis of algorithms [42]; along with areas like smooth analysis [45] and data-driven algorithm design [3], it takes advantage of the fact that real-world instances are not worst-case. Inspired by success in applications such as learned indices [27], there has been a great deal of theoretical study focusing on algorithms whose guarantees depend on the quality of a given predictor (c.f. the Mitzenmacher and Vassilvitskii [36] survey). The actual learning of this predictor has been studied less [1, 15, 16] and rarely in the online setting; we aim to change this with our study. Some papers improve online learning itself using predictions [39, 23, 14], but they also assume known predictors or only learn over a small set of policies, and their goal is minimizing regret not computation. In-general, we focus on showing how algorithms with predictions can make use of online learning rather than on new methods for the latter. Several works [4, 40, 2] use learning *while* advising an algorithm, in-effect taking a learning-inspired approach to better make use of a prediction *within* an algorithm, whereas we focus on learning the prediction *outside* of the target algorithm. Our paper presents the first general framework for efficiently learning useful predictors.

Data-driven algorithm design is a related area that has seen more learning-theoretic effort [19, 6, 3]. At a high-level, it often studies tuning parameters such as the gradient descent step-size [19] or settings of branch and bound [5], whereas the predictors in algorithms with predictions guess the sequence in an online algorithm [22] or the actual outcome of the computation [16]. The distinction can be viewed as terminological, since a prediction can be viewed as a parameter, but it can mean that in our settings we have full information about the loss function since it is typically some discrepancy between the full sequence or computational outcome and the prediction. In contrast, in data-driven algorithm design getting the cost of each parameter often requires additional computation, leading to (semi-)bandit settings [7]. A more salient difference is that data-driven algorithm design guarantees compete with the parameter that minimizes average cost but do not always quantify the improvement attainable via learning; in algorithms with predictions we do generally quantify this improvement with an upper bound on the cost that depends on the prediction quality, but we usually only compete with the parameter that is optimal for prediction quality, which is not always cost-optimal. We do adapt data-driven algorithm design tools like dispersion [6] for algorithms with predictions.

Our two-step approach to providing guarantees for algorithms with predictions is inspired by the Average Regret-Upper-Bound Analysis (ARUBA) framework [25] for studying meta-learning [18]. Instead of instances they have tasks with different data-points, and the upper bounds are on learning-theoretic quantities such as regret rather than computational costs such as runtime. Mathematically, ARUBA takes advantage of similar structure in the regret-upper-bounds that we find in algorithms with predictions, namely that the upper bounds encode some measure of the quality of the prediction (in their case an initialization for gradient descent) via a comparison to the ground-truth (in their case the optimal parameter). However, whereas in ARUBA the need to know this optimal parameter after seeing a task is a weakness that does not hold in practice, in algorithms with predictions the corresponding quantity—the feedback listed in Table 1—is generally known after seeing the instance.

## 3 Framework overview and application to bipartite matching

In this section we outline the theoretical framework for designing algorithms and proving guarantees for learned predictors. As an illustrative example we will use the Hungarian algorithm for bipartite matching, for which Dinitz et al. [16] demonstrated an instance-dependent upper bound on the running time using a learned dual vector. Along the way, we will show an improvement to their sample complexity bound together with the first online results for this setting.

**Bipartite matching:** For a bipartite graph on  $n$  nodes and  $m$  edges, **min-weight perfect matching** (MWPM) asks for the perfect matching with the least weight according to edge-costs  $\mathbf{c} \in \mathbb{Z}_{\geq 0}^m$ . A common approach here is the Hungarian algorithm, a convex optimization-based approach for which Dinitz et al. [16] showed a runtime bound of  $\tilde{O}(m\sqrt{n} \min\{\|\mathbf{x} - \mathbf{x}^*(\mathbf{c})\|_1, \sqrt{n}\})$ , where  $\mathbf{x} \in \mathbb{Z}^n$  initializes the duals in a primal-dual algorithm and  $\mathbf{x}^*(\mathbf{c}) \in \mathbb{Z}^n$  is dual of the optimal solution; note that the latter is obtained for free after running the Hungarian method.

**Step 1 - Upper bound:** The first step of our approach is to find a suitable function  $U_t(\mathbf{x})$  of the prediction  $\mathbf{x}$  that (a) upper bounds the target algorithm’s cost  $C_t(\mathbf{x})$ , (b) can be constructed completely once the algorithm terminates, and (c) can be efficiently optimized. These qualities allow learning the predictor in the second step. The requirements are similar to those of ARUBA for showing results for meta-learning [25], although there the quantity being upper-bounded was regret, not algorithmic cost.

**Algorithm 1:** Generic application of an online learning algorithm over  $\mathcal{X}$  to learn a predictor for a method `AlgorithmWithPrediction` that takes advice from  $\mathcal{X}$  and returns upper bounds  $U_t$  on its cost. The goal of `OnlineAlgorithm` is low regret over the sequence  $U_t$ , so that on-average  $C_t$  is upper bounded by the smallest possible average of  $U_t$ , up to some error decreasing in  $T$ . For specific instantiations of algorithms and feedback see Table 1.

---

```

initialize  $\mathbf{x}_1 \in \mathcal{X}$  for OnlineAlgorithm
for instance  $t = 1, \dots, T$  do
    obtain instance  $I_t$ 
    run AlgorithmWithPrediction( $I_t, \mathbf{x}_t$ )
        suffer cost  $C_t(\mathbf{x}_t) \leq U_t(\mathbf{x}_t)$ 
        get feedback to construct upper bound  $U_t$ 
     $\mathbf{x}_{t+1} \leftarrow \text{OnlineAlgorithm}(\{U_s\}_{s=1}^t, \mathbf{x}_1)$ 

```

---

Many guarantees for algorithms with predictions are already amenable to being optimized, although we will see that they can require some massaging in order to be useful. In many cases the guarantee is a distance metric between the prediction  $\mathbf{x}$  and some instance-dependent perfect prediction  $\mathbf{x}^*$ , which is convex and thus straightforward to learn. This is roughly true of our bipartite matching example, although taking the minimum of a constant and the distance  $\|\mathbf{x} - \mathbf{x}^*(\mathbf{c})\|_1$  between the predicted and actual duals makes the problem non-convex. However, we can further upper bound their result by  $\tilde{\mathcal{O}}(m\sqrt{n}\|\mathbf{x} - \mathbf{x}^*(\mathbf{c})\|_1)$ ; note that Dinitz et al. [16] also optimize this quantity, not the tighter upper bound with the minimum. While this might seem to be enough for step one, Dinitz et al. [16] also require the prediction  $\mathbf{x}$  to be integral, which is difficult to combine with standard online procedures. In order to get around this issue, we show that rounding any nonnegative real vector to the closest integer vector incurs only a constant multiplicative loss in terms of the  $\ell_1$ -distance.

**Claim 3.1.** *Given any vectors  $\mathbf{x} \in \mathbb{Z}^n$  and  $\mathbf{y} \in \mathbb{R}^n$ , let  $\tilde{\mathbf{y}} \in \mathbb{Z}^n$  be the vector whose elements are those of  $\mathbf{y}$  rounded to the nearest integer. Then  $\|\mathbf{x} - \tilde{\mathbf{y}}\|_1 \leq 2\|\mathbf{x} - \mathbf{y}\|_1$ .*

*Proof.* Let  $S \subset [n]$  be the set of indices  $i \in [n]$  for which  $\mathbf{x}_{[i]} \geq \mathbf{y}_{[i]} \iff \tilde{\mathbf{y}}_{[i]} = \lceil \mathbf{y}_{[i]} \rceil$ . For  $i \in [n] \setminus S$  we have  $|\mathbf{x}_{[i]} - \mathbf{y}_{[i]}| \geq 1/2 \geq |\tilde{\mathbf{y}}_{[i]} - \mathbf{y}_{[i]}|$  so it follows by the triangle inequality that

$$\begin{aligned} \|\mathbf{x} - \tilde{\mathbf{y}}\|_1 &= \sum_{i \in S} |\mathbf{x}_{[i]} - \tilde{\mathbf{y}}_{[i]}| + \sum_{i \in [n] \setminus S} |\mathbf{x}_{[i]} - \tilde{\mathbf{y}}_{[i]}| \leq \sum_{i \in S} |\mathbf{x}_{[i]} - \mathbf{y}_{[i]}| + \sum_{i \in [n] \setminus S} |\mathbf{x}_{[i]} - \mathbf{y}_{[i]}| + |\mathbf{y}_{[i]} - \tilde{\mathbf{y}}_{[i]}| \\ &\leq \sum_{i \in S} |\mathbf{x}_{[i]} - \mathbf{y}_{[i]}| + 2 \sum_{i \in [n] \setminus S} |\mathbf{x}_{[i]} - \mathbf{y}_{[i]}| \leq 2\|\mathbf{x} - \mathbf{y}\|_1 \end{aligned}$$

□

Combining this projection with the convex relaxation above and the result of Dinitz et al. [16] shows that for any predictor  $\mathbf{x} \in \mathbb{R}^n$  we have (up to affine transformation) a convex upper bound  $U_t(\mathbf{x}) = \|\mathbf{x} - \mathbf{x}^*(\mathbf{c}_t)\|_1$  on the runtime of the Hungarian method, as desired. We now move to step two.

**Step 2 - Online learning:** Once one has an upper bound  $U_t$  on the cost, the second component of our approach is to apply standard online learning algorithms and results to these upper bounds to obtain guarantees for learning predictions. In online learning, on each of a sequence of rounds  $t = 1, \dots, T$  we predict  $\mathbf{x}_t \in \mathcal{X}$  and suffer  $U_t(\mathbf{x}_t)$  for some adversarially chosen loss function  $U_t : \mathcal{X} \mapsto \mathbb{R}$  that we then observe; the goal is to use this information to minimize **regret**  $\sum_{t=1}^T U_t(\mathbf{x}_t) - \min_{\mathbf{x} \in \mathcal{X}} U_t(\mathbf{x})$ , with the usual requirement being that it is **sublinear** in  $T$  and thus decreasing on average over time. For bipartite matching, we can just apply regular **projected online (sub)gradient descent (OGD)** to losses  $U_t(\mathbf{x}) = \|\mathbf{x} - \mathbf{x}^*(\mathbf{c}_t)\|_1$ , i.e. the update rule  $\mathbf{x}_{t+1} \leftarrow \arg \min_{\mathbf{x} \in \mathcal{X}} \alpha \langle \nabla U_t(\mathbf{x}_t), \mathbf{x} \rangle + \frac{1}{2} \|\mathbf{x}\|_2^2$  for appropriate step-size  $\alpha > 0$ ; as shown in Theorem 3.1, this yields sublinear regret via a textbook result. The simplicity here is the point: by relegating as much of the difficulty as we can to obtaining an easy-to-optimize upper bound in step one, we make the actual learning-theoretic component easy. However, as we show in the following sections, it is not always easy to obtain a suitable upper bound, nor is it always obvious what online learning algorithm to apply, e.g. if the upper bounds are non-convex.

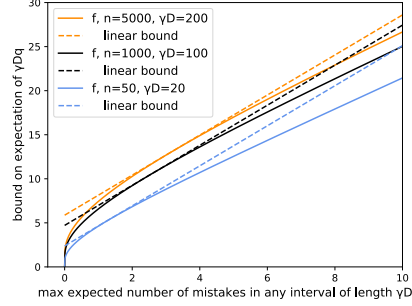

Figure 1: Bounds  $f$  (c.f. Lemma 4.1) for three different  $n$  and  $\gamma D$  on the expected largest number of mistakes in any  $\gamma D$ -interval as a function of the maximum expected number  $U_s(\mathbf{p})$  in any interval.

Our use of online learning is motivated by three factors: (1) doing well on non-i.i.d. instances is important in practical applications, e.g. in job scheduling where resource demand changes over time; (2) its extensive suite of algorithms lets us use different methods to tailor the approach to specific settings and obtain better bounds, as we exemplify via our use of exponentiated gradient over the simplex geometry in Section 4 and KT-OCO over unbounded Euclidean space in Section 5; (3) the existence of classic online-to-batch procedures for converting regret into sample complexity guarantees [12], i.e. bounds on the number of samples needed to obtain an  $\varepsilon$ -suboptimal predictor w.p.  $\geq 1 - \delta$ . While online-to-batch conversion can be suboptimal [20], as we show in Theorems 3.1, B.2, and D.1 its application to various graph algorithms with predictions problems *improves* upon existing sample complexity results. For completeness, we formalize online-to-batch conversion as Lemma A.1 in the Appendix.

We now show how to apply the second online learning step to bipartite matching by improving upon the result of Dinitz et al. [16] in Theorem 3.1; the improvement is the entirely new regret bound against adversarial cost vectors and a  $\tilde{O}(n)$  lower sample complexity. Note how the proof needs only their existing algorithmic contribution, Claim 3.1, and some standard tools in online convex optimization.

**Theorem 3.1.** *Suppose we have a fixed bipartite graph with  $n \geq 3$  vertices and  $m \geq 1$  edges.*

1. *For any cost vector  $\mathbf{c} \in \mathbb{Z}_{\geq 0}^m$  and any dual vector  $\mathbf{x} \in \mathbb{R}^n$  there exists an algorithm for MWPM that runs in time*

$$\tilde{O}(m\sqrt{n} \min\{U(\mathbf{x}), \sqrt{n}\}) \leq \tilde{O}(m\sqrt{n}U(\mathbf{x}))$$

*for  $U(\mathbf{x}) = \|\mathbf{x} - \mathbf{x}^*(\mathbf{c})\|_1$ , where  $\mathbf{x}^*(\mathbf{c})$  the optimal dual vector associated with  $\mathbf{c}$ .*

2. *There exists a poly-time algorithm s.t. for any  $\delta, \varepsilon > 0$  and distribution  $\mathcal{D}$  over integer  $m$ -vectors with  $\ell_\infty$ -norm  $\leq C$  it takes  $\mathcal{O}\left(\left(\frac{Cn}{\varepsilon}\right)^2 \log \frac{1}{\delta}\right)$  samples from  $\mathcal{D}$  and returns  $\hat{\mathbf{x}}$  s.t. w.p.  $\geq 1 - \delta$ :*

$$\mathbb{E}_{\mathbf{c} \sim \mathcal{D}} \|\hat{\mathbf{x}} - \mathbf{x}^*(\mathbf{c})\|_1 \leq \min_{\|\mathbf{x}\|_\infty \leq C} \mathbb{E}_{\mathbf{c} \sim \mathcal{D}} \|\mathbf{x} - \mathbf{x}^*(\mathbf{c})\|_1 + \varepsilon$$

3. *Let  $\mathbf{c}_1, \dots, \mathbf{c}_T \in \mathbb{Z}_{\geq 0}^m$  be an adversarial sequence of  $m$ -vectors with  $\ell_\infty$ -norm  $\leq C$ . Then OGD with appropriate step-size has regret*

$$\max_{\|\mathbf{x}\|_\infty \leq C} \sum_{t=1}^T \|\mathbf{x}_t - \mathbf{x}^*(\mathbf{c}_t)\|_1 - \|\mathbf{x} - \mathbf{x}^*(\mathbf{c}_t)\|_1 \leq Cn\sqrt{2T}$$

*Proof.* The first result follows by combining Dinitz et al. [16, Theorem 13] with Claim 3.1. For the third result, let  $\mathbf{x}_t$  be the sequence generated by running OGD [46] with step size  $C/\sqrt{2T}$  on the losses  $U_t(\mathbf{x}) = \|\mathbf{x} - \mathbf{x}^*(\mathbf{c}_t)\|_1$  over domain  $[-C, C]^n$ . Since these losses are  $\sqrt{n}$ -Lipschitz and the duals are  $C\sqrt{n}$ -bounded in Euclidean norm the regret guarantee follows from Shalev-Shwartz [44, Corollary 2.7]. For the second result, we apply standard online-to-batch conversion to the third result, i.e. we draw  $T = \Omega\left(\left(\frac{Cn}{\varepsilon}\right)^2 \log \frac{1}{\delta}\right)$  samples  $\mathbf{c}_t$ , run OGD as above on the resulting losses  $U_t$ , and set  $\hat{\mathbf{x}} = \frac{1}{T} \sum_{t=1}^T \mathbf{x}_t$  to be the average of the resulting predictions  $\mathbf{x}_t$ . The result follows by Lemma A.1.  $\square$

This concludes an overview of our two-step approach for obtaining learning guarantees for algorithms with predictions. To summarize, we propose to (1) obtain simple-to-optimize upper bounds  $U_t(\mathbf{x})$  on the cost of the target algorithm on instance  $t$  as a function of prediction  $\mathbf{x}$  and (2) optimize  $U_t(\mathbf{x})$  using online learning. While conceptually simple, even in this illustrative example it already improves upon past work; in the sequel we demonstrate further results that this approach makes possible. Note that, like Dinitz et al. [16], we are also able to generalize Theorem 3.1 to  $\mathbf{b}$ -matchings, which we do in Appendix B; another advantage of our approach is that it lets us prove online and statistical learning in the case where the demand vector  $\mathbf{b}$  varies across instances rather than staying fixed as in Dinitz et al. [16]. Finally, in Appendix D we also improve upon the more recent learning-theoretic results of Chen et al. [13] for related graph algorithms with predictions problems.

## 4 Predicting requests for page migration

Equipped with our two-step approach for deriving guarantees for learning predictors, we investigate several more important problems in combinatorial optimization, starting with the page migration problem. Our results demonstrate that even for learning such simple predictors there are interesting technical challenges in deriving a *learnable* upper bound. Nevertheless, once this is accomplished the second step of our approach is again straightforward.

**Page migration:** Consider a server that sees a sequence of requests  $s_{[1]}, \dots, s_{[n]}$  from metric space  $(\mathcal{K}, d)$  and at each timestep decides whether to change its state  $a_{[i]} \in \mathcal{K}$  at cost  $Dd(a_{[i-1]}, a_{[i]})$  for some  $D > 1$ ; it then suffers a further cost  $d(a_{[i]}, s_{[i]})$ . The **online page migration (OPM)** problem is then to minimize the cost to the server. Recently, Indyk et al. [22] studied a setting where we are given a sequence of predicted points  $\hat{s}_{[1]}, \dots, \hat{s}_{[n]} \in \mathcal{K}$  to aid the page migration algorithm. They show that if there exists  $\gamma, q \in (0, 1)$  s.t.  $\gamma D \in [n]$  and for any  $i \in [n]$  we have  $\sum_{j=i}^{i+\gamma D-1} \mathbf{1}_{s_{[j]} \neq \hat{s}_{[j]}} \leq q\gamma D$  then there exists an algorithm with competitive ratio  $(1 + \gamma)(1 + \mathcal{O}(q))$  w.r.t. to the offline optimal. This algorithm depends on  $\gamma$  but not  $q$ , so we study the setting where  $\gamma$  is fixed.

**Deriving an upper bound:** As in the previous section, the predictions are discrete, so to use our approach we must convert it into a continuous problem. As we have fixed  $\gamma$ , the competitive ratio is an affine function of the following upper bound on  $q$ :

$$Q(\hat{s}, s) = \frac{1}{\gamma D} \max_{i \in [n-\gamma D+1]} \sum_{j=i}^{i+\gamma D-1} \mathbf{1}_{\hat{s}_{[j]} \neq s_{[j]}}$$

We assume that the set of points  $\mathcal{K}$  is finite with indexing  $k = 1, \dots, |\mathcal{K}|$  and use this to introduce our continuous relaxation, a natural randomized approach converting the problem of learning a prediction into  $n$  experts problems on  $|\mathcal{K}|$  experts. For each  $j \in [n]$  we define a probability vector  $\mathbf{p}_{[j]} \in \Delta_{|\mathcal{K}|}$  governing the categorical r.v.  $\hat{s}_{[j]}$ , i.e.  $\Pr\{\hat{s}_{[j]} = k\} = \mathbf{p}_{[j,k]} \forall k \in \mathcal{K}$ . Under these distributions the expected competitive ratio will be  $(1 + \gamma)(1 + \mathcal{O}(\mathbb{E}_{\hat{s} \sim \mathbf{p}} Q(\hat{s}, s)))$ , for  $\mathbf{p}$  the product distribution of the vectors  $\mathbf{p}_j$ . Note that forcing each  $\mathbf{p}_j$  to be a one-hot vector recovers the original approach with no loss, so optimizing  $\mathbb{E}_{\hat{s} \sim \mathbf{p}} Q(\hat{s}, s)$  over  $\mathbf{p} \in \Delta_{|\mathcal{K}|}^n$  would find a predictor that fits the original result.

However,  $\mathbb{E}_{\hat{s} \sim \mathbf{p}} Q(\hat{s}, s)$  is not convex in  $\mathbf{p}$ . The simplest relaxation is to replace the maximum by summation, but this leads to a worst-case bound of  $\mathcal{O}\left(\frac{n}{\gamma D}\right)$ . We instead bound  $\mathbb{E}_{\hat{s} \sim \mathbf{p}} Q(\hat{s}, s)$ —and thus also the expected competitive ratio—by a function of the following maximum over expectations:

$$U_s(\mathbf{p}) = \max_{i \in [n-\gamma D+1]} \mathbb{E}_{\hat{s} \sim \mathbf{p}} \sum_{j=i}^{i+\gamma D-1} \mathbf{1}_{\hat{s}_{[j]} \neq s_{[j]}} = \max_{i \in [n-\gamma D+1]} \sum_{j=i}^{i+\gamma D-1} 1 - \langle \mathbf{s}_{[j]}, \mathbf{p}_{[j]} \rangle$$

where  $\mathbf{s}_{[j,k]} = \mathbf{1}_{s_{[j]}=k} \forall k \in \mathcal{K}$ , i.e.  $\mathbf{s}_{[j]}$  encodes the location in  $\mathcal{K}$  of the  $j$ th request. As a maximum over  $n - \gamma D + 1$  convex functions this objective is also convex. Note also that if  $U_s(\mathbf{p})$  is zero—i.e. the probability vectors are one-hot and perfect—then  $\mathbb{E}_{\hat{s} \sim \mathbf{p}} Q(\hat{s}, s) \geq q$  will also be zero. In fact,  $q$  is upper-bounded by a monotonically increasing function of  $U_s(\mathbf{p})$  that is zero at the origin, but as this function is concave and non-Lipschitz (c.f. Figure 1) we incur an additive  $\mathcal{O}\left(\frac{\log(n-\gamma D+1)}{\gamma D}\right)$  loss to obtain an online-learnable upper bound. This is formalized in the following result (proof in A.1).

**Lemma 4.1.** *There exist constants  $a < e, b < 2/e$  and a monotonically increasing function  $f : [0, \infty) \mapsto [0, \infty)$  s.t.  $f(0) = 0$  and*

$$\mathbb{E}_{\hat{s} \sim \mathbf{p}} Q(\hat{s}, s) \leq \frac{f(U_s(\mathbf{p}))}{\gamma D} \leq \frac{aU_s(\mathbf{p}) + b \log(n - \gamma D + 1)}{\gamma D}$$

We now have an convex bound on the competitive ratio for the OPM algorithm of Indyk et al. [22]. For both this and bipartite matching we resorted to a relaxation of a discrete problem. However, whereas before we only incurred a multiplicative loss (c.f. Claim 3.1), here we have an additive loss that makes the bound meaningful only for  $\gamma D \gg \log n$ . However, as the method we propose optimizes  $U_s(\mathbf{p})$ , which bounds  $q$  with no additive error via the function  $f$  in Lemma 4.1, in-practice we may expect it to help minimize  $q$  in all regimes. Note that the non-Lipschitzness near zero that prevents using  $f$  for formal regret guarantees comes from the poor tail behavior of Poisson-like random variables with small means, which we do not expect can be significantly improved.

**Learning guarantees:** Having established an upper bound, in Theorem 4.2 we again show how a learning-theoretic result follows from standard online learning. This time, instead of OGD we run **exponentiated (sub)gradient (EG)** [44], a classic method for learning from experts, on each of  $n$  simplices to learn the probabilities  $\mathbf{p}_{[j]} \forall j \in [n]$ . The multiplicative update  $\mathbf{x}_{t+1} \propto \mathbf{x}_t \odot \exp(-\alpha \nabla U_t(\mathbf{x}_t))$  of EG is notable for yielding regret logarithmic in the size  $|\mathcal{K}|$  of the simplices, which is important for large metric spaces. Note that as the relaxation is randomized, our algorithms output a dense probability vector; to obtain a prediction for OPM we sample  $\hat{s}_{t[j]} \sim \mathbf{p}_{[j]} \forall j \in [n]$ .

**Theorem 4.2.** Let  $(\mathcal{K}, d)$  be a finite metric space.

1. For any request sequence  $s$  and any set of probability vectors  $\mathbf{p} \in \Delta_{|\mathcal{K}|}^n$  there exists an algorithm for OPM with expected competitive ratio

$$(1 + \gamma) \left( 1 + \mathcal{O} \left( \frac{U_s(\mathbf{p}) + \log(n - \gamma D + 1)}{\gamma D} \right) \right)$$

2. There exists a poly-time algorithm s.t. for any  $\delta, \varepsilon > 0$  and distribution  $\mathcal{D}$  over request sequences  $s \in \mathcal{K}^n$  it takes  $\mathcal{O} \left( \left( \frac{\gamma D}{\varepsilon} \right)^2 (n^2 \log |\mathcal{K}| + \log \frac{1}{\delta}) \right)$  samples from  $\mathcal{D}$  and returns  $\hat{\mathbf{p}}$  s.t. w.p.  $\geq 1 - \delta$ :

$$\mathbb{E}_{s \sim \mathcal{D}} U_s(\hat{\mathbf{p}}) \leq \min_{\mathbf{p} \in \Delta_{|\mathcal{K}|}^n} \mathbb{E}_{s \sim \mathcal{D}} U_s(\mathbf{p}) + \varepsilon$$

3. Let  $s_1, \dots, s_T$  be an adversarial sequence of request sequences. Then updating the distribution  $\mathbf{p}_{t[j]}$  over  $\Delta_{|\mathcal{K}|}$  at each timestep  $j \in [n]$  using EG with appropriate step-size has regret

$$\max_{\mathbf{p} \in \Delta_{|\mathcal{K}|}^n} \sum_{t=1}^T U_{s_t}(\mathbf{p}_t) - U_{s_t}(\mathbf{p}) \leq \gamma D n \sqrt{2T \log |\mathcal{K}|}$$

*Proof.* The first result follows by combining Indyk et al. [22, Theorem 1] with Lemma 4.1. For the third let  $\mathbf{p}_t$  be generated by running  $n$  exponentiated gradient algorithms with step-size  $\sqrt{\frac{\log |\mathcal{K}|}{2\gamma^2 D^2 T}}$  on losses  $U_{s_t}(\mathbf{p})$  over  $\Delta_{|\mathcal{K}|}^n$ . Since these are  $\gamma D$ -Lipschitz and the maximum entropy is  $\log |\mathcal{K}|$ , the regret follows by [44, Theorem 2.15]. For the second result, apply standard online-to-batch conversion to the third, i.e. draw  $T = \Omega \left( \left( \frac{\gamma D}{\varepsilon} \right)^2 (n^2 \log |\mathcal{K}| + \log \frac{1}{\delta}) \right)$  samples  $s_t$ , run EG on  $U_{s_t}(\mathbf{p})$  as above, and set  $\hat{\mathbf{p}} = \frac{1}{T} \sum_{t=1}^T \mathbf{p}_t$  to be the average of the resulting actions. The result follows by Lemma A.1.  $\square$

As before, this result first shows how the quantity of interest—here the competitive ratio—is upper-bounded by an affine function of some quality measure  $U_s(\mathbf{p})$ , for which we then provide regret and statistical guarantees using online learning. The difficulty deriving a suitable bound exemplifies the technical challenges that arise in learning predictors, and may also be encountered in other sequence prediction problems such as TCP [10]. Nevertheless, our approach does yield an online procedure that incurs only  $\mathcal{O} \left( \frac{\log n}{\gamma D} \right)$  additive error over Indyk et al. [22] in the case of a perfect predictor and, unlike their work, we provide an algorithm for learning the predictor itself. In Appendix C.2 we also show an auto-regressive extension which does *not* require learning a distribution for each timestep  $j \in [n]$ .

## 5 Learning linear predictors with instance-feature inputs

So far we have considered only *fixed* predictors, either optima-in-hindsight in the online setting or a population risk minimizers for i.i.d. data. Actual instances can vary significantly and so a fixed predictor may not be very good, e.g. in the example of querying a sorted array it means always returning the same index. In the online setting one can consider methods that adapt to dynamic comparators [46, 23, 37], which are also applicable to our upper bounds; however, these still need measures such as the comparator path-length to be small, which may be more reasonable in some cases but not all.

We instead study the setting where all instances come with instance-specific features, a natural and practical assumption [27, 30] that encompasses numerical representations of the instance itself—e.g. bits representing a query or a graph—or other information such as weather or day of the week. These are passed to functions—e.g. linear predictors, neural nets, or trees—whose parameters can be learned from data. We study linear predictors, which are often amenable to similar analyses as above since the composition of a convex and affine function is convex. For example, it is straightforward to extend the matching results to learning linear predictors of duals. OPM is more challenging because the outputs must lie in the simplex, which can be solved by learning rectangular stochastic matrices. Both sets of results are shown in Appendix C. Notably, for page migration our guarantees cover the auto-regressive setting where the server probabilities are determined by a fixed linear transform of past states.

Our main example will be online job scheduling via minimizing the fractional makespan [30], where we must assign each in a sequence of variable-sized jobs to one of  $m$  machines. Lattanzi et al. [30] provide an algorithm that uses predictions  $\hat{\mathbf{w}} \in \mathbb{R}_{>0}^m$  of “good” machine weights  $\mathbf{w} \in \mathbb{R}_{>0}^m$  to assign jobs

based on how well  $\hat{\mathbf{w}}$  corresponds to machine demand; the method has a performance guarantee of  $\mathcal{O}(\log \min\{\max_i \frac{\hat{w}_{[i]}}{w_{[i]}}, m\})$ . They also discuss learning linear and other predictors, but without guarantees. We study linear prediction of the *logarithm* of the machine weights, which makes the problem convex, and assume features lie in the  $f$ -dimensional simplex. For simplicity we only consider learning the linear transform from features to predictors and not the intercept, as the former subsumes the latter. For the online result, we use **KT-OCO** [38, Algorithm 1], a parameter-free subgradient method with update  $\mathbf{x}_{t+1} \leftarrow \frac{1 + \sum_{s=1}^t \langle \mathbf{g}_s, \mathbf{x}_s \rangle}{t+1} \sum_{s=1}^t \mathbf{g}_s$  for  $\mathbf{g}_s = \nabla U_s(\mathbf{x}_s)$ ; it allows us to not assume any bound on the machine weights and thus to compete with the optimal linear predictor in all of  $\mathbb{R}^{m \times f}$ .

**Theorem 5.1.** *Consider online restricted assignment with  $m \geq 1$  machines [30, Section 2.1].*

1. *For predicted logits  $\mathbf{x} \in \mathbb{R}^m$  there is an algorithm whose fractional makespan has competitive ratio*

$$\mathcal{O}(\min\{\|\mathbf{x} - \log \mathbf{w}\|_\infty, \log m\}) \leq \mathcal{O}(U(\mathbf{x}))$$

for  $U(\mathbf{x}) = \|\mathbf{x} - \log \mathbf{w}\|_\infty$ , where  $\mathbf{w} \in \mathbb{R}_{>0}^m$  are good machine weights [30, Section 3].

2. *There exists a poly-time algorithm s.t. for any  $\delta, \varepsilon > 0$  and distribution  $\mathcal{D}$  over machine (weight, feature) pairs  $(\mathbf{w}, \mathbf{f}) \in \mathbb{R}_{>0}^m \times \Delta_f$  s.t.  $\|\log \mathbf{w}\|_\infty \leq B$  the algorithm takes  $\mathcal{O}\left(\left(\frac{B}{\varepsilon}\right)^2 (mf + \log \frac{1}{\delta})\right)$  samples from  $\mathcal{D}$  and returns  $\hat{\mathbf{A}} \in \mathbb{R}^{m \times f}$  s.t. w.p.  $\geq 1 - \delta$*

$$\mathbb{E}_{(\mathbf{w}, \mathbf{f}) \sim \mathcal{D}} \|\hat{\mathbf{A}}\mathbf{f} - \log \mathbf{w}\|_\infty \leq \min_{\|\mathbf{A}\|_{\max} \leq B} \mathbb{E}_{(\mathbf{w}, \mathbf{f}) \sim \mathcal{D}} \|\mathbf{A}\mathbf{f} - \log \mathbf{w}\|_\infty + \varepsilon$$

3. *Let  $(\mathbf{w}_1, \mathbf{f}_1), \dots, (\mathbf{w}_T, \mathbf{f}_T) \in \mathbb{R}_{>0}^m \times \Delta_f$  be an adversarial sequence of (weights, feature) pairs. Then for any  $\mathbf{A} \in \mathbb{R}^{m \times f}$  KT-OCO has regret*

$$\sum_{t=1}^T \|\mathbf{A}_t \mathbf{f}_t - \log \mathbf{w}_t\|_\infty - \|\mathbf{A} \mathbf{f}_t - \log \mathbf{w}_t\|_\infty \leq \|\mathbf{A}\|_F \sqrt{T \log(1 + 24T^2 \|\mathbf{A}\|_F^2)} + 1$$

If we restrict to matrices with entries bounded by  $B$  then OGD with appropriate step-size has regret

$$\max_{\|\mathbf{A}\|_{\max} \leq B} \sum_{t=1}^T \|\mathbf{A}_t \mathbf{f}_t - \log \mathbf{w}_t\|_\infty - \|\mathbf{A} \mathbf{f}_t - \log \mathbf{w}_t\|_\infty \leq B \sqrt{2mfT}$$

*Proof.* The first result follows by substituting  $\max_i \frac{\exp(\mathbf{x}_{[i]})}{w_{[i]}}$  for  $\eta$  in Lattanzi et al. [30, Theorem 3.1] and upper bounding the maximum by the  $\ell_\infty$ -norm. For the third, since  $U_t$  is 1-Lipschitz w.r.t. the Euclidean norm we apply the guarantee for KT-OCO [38, Algorithm 1] using  $\varepsilon = 1$  and the subgradients of  $\|\mathbf{A}_t \mathbf{f}_t - \log \mathbf{w}_t\|_\infty$  as rewards [38, Corollary 5]. The result for  $B$ -bounded  $\mathbf{A}$  follows by applying OGD with step-size  $B \sqrt{\frac{mf}{2T}}$  over  $\|\mathbf{A}\|_{\max} \leq B$  [44, Corollary 2.7]. Finally, the second result follows by applying online-to-batch conversion to the latter result, i.e. draw  $T = \Omega\left(\left(\frac{B}{\varepsilon}\right)^2 (mf + \log \frac{1}{\delta})\right)$  samples  $(\mathbf{w}_t, \mathbf{f}_t)$ , run OGD on the resulting losses  $\|\mathbf{A} \mathbf{f}_t - \log \mathbf{w}_t\|_\infty$  as above, and set  $\hat{\mathbf{A}} = \frac{1}{T} \sum_{t=1}^T \mathbf{A}_t$  to be the average of the resulting actions  $\mathbf{A}_t$ . The result follows by Lemma A.1.  $\square$

This guarantee is the first we are aware of for learning non-static predictors in the algorithms with predictions literature. It demonstrates both how to extend fixed predictor results to learning linear predictors—note that the former is recovered by having  $\mathbf{f}_t = \mathbf{1}_1 \forall t$ —and how to handle unbounded predictor domains. The ability to provide such guarantees is another advantage of our approach.

## 6 Tuning robustness-consistency trade-offs for scheduling and ski-rental

We turn to tuning robustness-consistency trade-offs, introduced in Lykouris and Vassilvitskii [34]. This trade-off captures the tension between following the predictions when they are good (consistency) and doing not much worse than the worst-case guarantee in either case (robustness). In many cases, this trade-off can be made explicit, by a parameter  $\lambda \in [0, 1]$ . The setting of  $\lambda$  is crucial, yet previous work left the decision to the end-user. Here we show that it is often eminently learnable in an online setting. We then demonstrate how to accomplish a much harder task—tuning  $\lambda$  at the same time as learning to predict—on two related but technically very different variants of the ski-rental problem. This meta-application highlights the applicability of our approach to non-convex upper bounds.



**Robustness-consistency trade-offs:** Most problems studied in online algorithms with predictions usually have existing worst-case guarantees on the competitive ratio, i.e. a constant  $\gamma \geq 1$  on how much worse (multiplicatively) a learning-free algorithm does relative to the offline optimal cost  $\text{OPT}_t$  on instance  $t$ . While the goal of algorithms with predictions is to use data to do better than this worst-case bound, an imperfect prediction may lead to much worse performance. As a result, most guarantees strive to upper bound the cost of an algorithm with prediction  $\mathbf{x}$  on an instance  $t$  as follows:

$$C_t(\mathbf{x}, \lambda) \leq \min \{f(\lambda)u_t(\mathbf{x}), g_t(\lambda)\}$$

Here  $u_t$  is some measure of the quality of  $\mathbf{x}$  on instance  $t$ ,  $\lambda \in [0, 1]$  is a parameter,  $f$  is a monotonically increasing function that ideally satisfies  $f(0) = 1$ , and  $g_t$  is a monotonically decreasing function that ideally satisfies  $g_t(1) = \gamma \text{OPT}_t$ . A very common structure is  $f(\lambda) = 1/(1 - \lambda)$  and  $g_t(\lambda) = \frac{\gamma}{\lambda} \text{OPT}_t$ . For example, consider job scheduling with predictions, a setting where we are given  $n$  jobs and their predicted runtimes with total absolute error  $\eta$  and must minimize the sum of their completion times when running on a single server with pre-emption. Here Kumar et al. [29, Theorem 3.3] showed that a preferential round-robin algorithm has competitive ratio at most  $\min \left\{ \frac{1+2\eta/n}{1-\lambda}, \frac{2}{\lambda} \right\}$ . Thus if we know the prediction is perfect we can set  $\lambda = 0$  and obtain the optimal cost (consistency); on the other hand, if we know the prediction is poor we can set  $\lambda = 1$  and get the (tight) worst-case guarantee of two (robustness).

Of course in-practice we often do not know how good a prediction is on a specific instance  $t$ ; we thus would like to learn to set  $\lambda$ , i.e. to learn how trustworthy our prediction is. As a first step, we can consider doing so when we are given a prediction for each instance and thus only need to optimize over  $\lambda$ . For example, the just-discussed problem of job scheduling has competitive ratio upper-bounded by  $U_t(\lambda) = \min \left\{ \frac{1+2\eta_t/n_t}{1-\lambda}, \frac{2}{\lambda} \right\}$  for  $n_t$  and  $\eta_t$  the number of jobs and the prediction quality, respectively, on instance  $t$ . Assuming a bound  $B$  on the average error makes  $U_t$  Lipschitz, so we can apply the **exponentially weighted average forecaster** [28, Algorithm 1], also known as the **exponential forecaster**. This algorithm, whose action at each time  $t + 1$  is to sample from the distribution with density  $\rho_{t+1}(\cdot) \propto \rho_1(\cdot) \exp(-\alpha \sum_{s=1}^t U_s(\cdot))$ , has the following regret guarantee (proof in A.2):

**Corollary 6.1.** *For the competitive ratio upper bounds  $U_t$  of the job scheduling problem with average prediction error  $\eta/n_t$  at most  $B$  the exponential forecaster with appropriate step-size has expected regret*

$$\max_{\lambda \in [0,1]} \mathbb{E} \sum_{t=1}^T U_t(\lambda_t) - U_t(\lambda) \leq 9B \left( 1 + \sqrt{\frac{T}{2} \log T} \right)$$

Thus a standard learning method produces a sequence  $\lambda_t$  that performs as well as the best  $\lambda$  asymptotically. We next consider the more difficult problem of simultaneously tuning  $\lambda$  learning to predict.

**Ski-rental:** We instantiate this challenge on ski-rental, in which each task  $t$  is a ski season with an unknown number of days  $n_t \in \mathbb{Z}_{\geq 2}$ ; to ski each day, we must either buy skis at price  $b_t$  or rent each day for the price of one. The optimal offline behavior is to buy iff  $b_t < n_t$ , and the best algorithm has worst-case competitive ratio  $e/(e - 1)$ . Kumar et al. [29] and Bamas et al. [10, Theorem 2] further derive an algorithm with the following robustness-consistency trade-off between blindly following a prediction  $x$  and incurring cost  $u_t(x) = b_t 1_{x > b_t} + n_t 1_{x \leq b_t}$  or going with the worst-case guarantee:

$$U_t(x, \lambda) = \frac{\min\{\lambda u_t(x), b_t, n_t\}}{1 - e_t(-\lambda)}, e_t(z) = (1 + 1/b_t)^{b_t z}$$

Assuming a bound of  $N \geq 2$  on the number of days and  $B > 0$  on the buy price implies that  $U_t$  is bounded and Lipschitz w.r.t.  $\lambda$ . We can thus run exponentiated gradient on the functions  $U_t$  to learn a categorical distribution over the product set  $[N] \times \{\delta/2, \dots, 1 - \delta/2\}$  for some  $\delta$  s.t.  $1/\delta \in \mathbb{Z}_{\geq 2}$ . This yields the following bound on the expected regret (proof in A.3).

**Corollary 6.2.** *For the competitive ratio upper bounds  $U_t$  of the discrete ski-rental problem the randomized exponentiated gradient algorithm with an appropriate step-size has expected regret*

$$\max_{x \in [N], \lambda \in (0,1)} \mathbb{E} \sum_{t=1}^T U_t(x_t, \lambda_t) - U_t(x, \lambda) \leq 6N \sqrt{T \log(BNT)}$$

Thus via an appropriate discretization the sequence of predictions  $(x_t, \lambda_t)$  does as well as the joint optimum on this problem. However, we can also look at a case where we are not able to just discretize

to get low regret. In particular, we consider the *continuous* ski-rental problem, where each day  $n_t > 1$  is a real number, and study how to pick thresholds  $x$  after which to buy skis, which has cost  $u_t(x) = n_t 1_{n_t \leq x} + (b_t + x) 1_{n_t > x}$ . Note that  $x = 0$  and  $x = N$  recovers the previous setting where our decision was to buy or not at the beginning. For this setting, Diakonikolas et al. [15] adapt an algorithm of Mahdian et al. [35] to bound the cost as follows:

$$C_t(x, \lambda) \leq U_t(x, \lambda) = \min \left\{ \frac{u_t(x)}{1 - \lambda}, \frac{e \min\{n_t, b_t\}}{(e - 1)\lambda} \right\}$$

While the bound is simpler as a function of  $\lambda$ , it is discontinuous in  $x$  because  $u_t$  is piecewise-Lipschitz. Since one cannot even attain sublinear regret on adversarially chosen threshold functions, we must make an assumption on the data. In particular, we will assume the days are *dispersed*:

**Definition 6.3.** A set of (possibly random) points  $n_1, \dots, n_T \in \mathbb{R}$  are  $\beta$ -**dispersed** if  $\forall \varepsilon \geq T^{-\beta}$  the expected number in any  $\varepsilon$ -ball is  $\tilde{O}(\varepsilon T)$ , i.e.  $\mathbb{E} \max_{x \in [0, N]} |\{x \pm \varepsilon\} \cap \{n_1, \dots, n_T\}| = \tilde{O}(\varepsilon T)$ .

Dispersion encodes the stipulation that the days, and thus the discontinuities of  $u_t(x, \lambda)$ , are not too concentrated. In the i.i.d. setting, a simple condition that leads to dispersion with  $\beta = 1/2$  is the assumption that the points are drawn from a  $\kappa$ -bounded distribution [6, Lemma 1]. Notably this is a strictly weaker assumption than the log-concave requirement of Diakonikolas et al. [15] that they used to show statistical learning results for ski-rental. Having stipulated that the ski-days are  $\beta$ -dispersed, we can show that it implies dispersion of the loss functions [6] and thus obtain the following guarantee for the exponential forecaster applied to  $U_t(x, \lambda)$  (proof in A.4):

**Corollary 6.4.** *For cost upper bounds  $U_t$  of the continuous ski-rental problem the exponential forecaster with an appropriate step-size has expected regret*

$$\max_{x \in [0, N], \lambda \in (0, 1]} \mathbb{E} \sum_{t=1}^T U_t(x_t, \lambda_t) - U_t(x, \lambda) \leq \tilde{O} \left( \sqrt{T \log(NT)} + (N + B)^2 T^{1-\beta} \right)$$

Thus in two mathematically quite different settings of ski-rental we can directly apply online learning to existing bounds to not only learn online the best action for ski-rental, but to at the same time learn how trustworthy the best action is via tuning the robustness-consistency trade-off.

## 7 Conclusion and future work

The field of algorithms with predictions has been successful in circumventing worst case lower bounds and showing how simple predictions can improve algorithm performance. However, except for a few problem-specific approaches, the question of *how* to predict has largely been missing from the discussion. In this work we presented the first general framework for efficiently learning useful predictions and applied it to a diverse set of previously studied problems, giving the first low regret learning algorithms, reducing sample complexity bounds, and showing how to learn the best consistency-robustness trade-off. One current limitation is the lack of more general-case guarantees for *simultaneously* tuning robustness-consistency and learning the predictor, which we only show for ski-rental. There are also several other avenues for future work. The first is to build on our results and provide learning guarantees for other problems where the algorithmic question of *how* to use predictions is already addressed. Another is to try to improve known bounds by solving the problems holistically: developing easy-to-learn parameters in concert with developing algorithms that can use them. Finally, there is the direction of identifying hard problems: what are the instances where no reasonable prediction can help improve an algorithm’s performance?

## Acknowledgments

We thank Yilin Yan, Alexander Smola, Shinsaku Sakaue, and Taihei Oki for helpful discussion. This material is based on work supported in part by the National Science Foundation under grants CCF-1535967, CCF-1910321, IIS-1618714, IIS-1705121, IIS-1838017, IIS-1901403, IIS-2046613, and SES-1919453; the Defense Advanced Research Projects Agency under cooperative agreements HR00112020003 and FA875017C0141; a Simons Investigator Award; an AWS Machine Learning Research Award; an Amazon Research Award; a Bloomberg Research Grant; a Microsoft Research Faculty Fellowship; an Amazon Web Services Award; a Facebook Faculty Research Award; funding from Booz Allen Hamilton Inc.; a Block Center Grant; and a Facebook PhD Fellowship. Any opinions, findings and conclusions or recommendations expressed in this material are those of the author(s) and do not necessarily reflect the views of any of these funding agencies.

## References

- [1] Keerti Anand, Rong Ge, and Debmalya Panigrahi. Customizing ML predictions for online algorithms. In *Proceedings of the 37th International Conference on Machine Learning*, 2020.
- [2] Keerti Anand, Rong Ge, Amit Kumar, and Debmalya Panigrahi. A regression approach to learning-augmented online algorithms. In *Advances in Neural Information Processing Systems*, 2021.
- [3] Maria-Florina Balcan. Data-driven algorithm design. In Tim Roughgarden, editor, *Beyond the Worst-Case Analysis of Algorithms*. Cambridge University Press, Cambridge, UK, 2021.
- [4] Maria-Florina Balcan and Avrim Blum. Approximation algorithms and online mechanisms for item pricing. *Theory of Computing*, 3:179–195, 2007.
- [5] Maria-Florina Balcan, Travis Dick, Tuomas Sandholm, and Ellen Vitercik. Learning to branch. In *Proceedings of the 35th International Conference on Machine Learning*, 2018.
- [6] Maria-Florina Balcan, Travis Dick, and Ellen Vitercik. Dispersion for data-driven algorithm design, online learning, and private optimization. In *2018 IEEE 59th Annual Symposium on Foundations of Computer Science (FOCS)*, pages 603–614, 2018.
- [7] Maria-Florina Balcan, Travis Dick, and Wesley Pegden. Semi-bandit optimization in the dispersed setting. In *Proceedings of the Conference on Uncertainty in Artificial Intelligence*, 2020.
- [8] Maria-Florina Balcan, Dan DeBlasio, Travis Dick, Carl Kingsford, Tuomas Sandholm, and Ellen Vitercik. How much data is sufficient to learn high-performing algorithms? Generalization guarantees for data-driven algorithm design. In *Proceedings of the 53rd Annual ACM SIGACT Symposium on Theory of Computing*, 2021.
- [9] Maria-Florina Balcan, Mikhail Khodak, Dravyansh Sharma, and Ameet Talwalkar. Learning-to-learn non-convex piecewise-Lipschitz functions. In *Advances in Neural Information Processing Systems*, 2021.
- [10] Etienne Bamas, Andreas Maggiori, and Ola Svensson. The primal-dual method for learning augmented algorithms. In *Advances in Neural Information Processing Systems*, 2020.
- [11] Peter Bartlett, Piotr Indyk, and Tal Wagner. Generalization bounds for data-driven numerical linear algebra. In *Proceedings of the 35th Annual Conference on Learning Theory*, 2022.
- [12] Nicolò Cesa-Bianchi, Alex Conconi, and Claudio Gentile. On the generalization ability of on-line learning algorithms. *IEEE Transactions on Information Theory*, 50(9):2050–2057, 2004.
- [13] Justin Y. Chen, Sandeep Silwal, Ali Vakilian, and Fred Zhang. Faster fundamental graph algorithms via learned predictions. In *Proceedings of the 40th International Conference on Machine Learning*, 2022.
- [14] Ofer Dekel, Arthur Flajolet, Nika Haghtalab, and Patrick Jaillet. Online learning with a hint. In *Advances in Neural Information Processing Systems*, 2017.
- [15] Ilias Diakonikolas, Vasilis Kontonis, Christos Tzamos, Ali Vakilian, and Nikos Zarifis. Learning online algorithms with distributional advice. In *Proceedings of the 38th International Conference on Machine Learning*, 2021.
- [16] Michael Dinitz, Sungjin Im, Thomas Lavastida, Benjamin Moseley, and Sergei Vassilvitskii. Faster matchings via learned duals. In *Advances in Neural Information Processing Systems*, 2021.
- [17] Elbert Du, Franklyn Wang, and Michael Mitzenmacher. Putting the “learning” into learning-augmented algorithms for frequency estimation. In *Proceedings of the 38th International Conference on Machine Learning*, 2021.

- [18] Chelsea Finn, Pieter Abbeel, and Sergey Levine. Model-agnostic meta-learning for fast adaptation of deep networks. In *Proceedings of the 34th International Conference on Machine Learning*, 2017.
- [19] Rishi Gupta and Timothy Roughgarden. A PAC approach to application-specific algorithm selection. *SIAM Journal on Computing*, 46(3):992–1017, 2017.
- [20] Elad Hazan and Satyen Kale. Beyond the regret minimization barrier: Optimal algorithms for stochastic strongly-convex optimization. *Journal of Machine Learning Research*, 15:2489–2512, 2014.
- [21] David P. Helmbold and Manfred K. Warmuth. Learning permutations with exponential weights. *Journal of Machine Learning Research*, 10:1705–1736, 2009.
- [22] Piotr Indyk, Frederik Mallmann-Trenn, Slobodan Mitrović, and Ronitt Rubinfeld. Online page migration with ML advice. In *Proceedings of the 25th International Conference on Artificial Intelligence and Statistics*, 2022.
- [23] Ali Jadbabaie, Alexander Rakhlin, and Shahin Shahrampour. Online optimization: Competing with dynamic comparators. In *Proceedings of the 18th International Conference on Artificial Intelligence and Statistics*, 2015.
- [24] Zhihao Jiang, Debmalya Panigrahi, and Kevin Sun. Online algorithms for weighted paging with predictions. In *Proceedings of the 47th International Colloquium on Automata, Languages, and Programming*, 2020.
- [25] Mikhail Khodak, Maria-Florina Balcan, and Ameet Talwalkar. Adaptive gradient-based meta-learning methods. In *Advances in Neural Information Processing Systems*, 2019.
- [26] Mikhail Khodak, Renbo Tu, Tian Li, Liam Li, Maria-Florina Balcan, Virginia Smith, and Ameet Talwalkar. Federated hyperparameter tuning: Challenges, baselines, and connections to weight-sharing. In *Advances in Neural Information Processing Systems*, 2021.
- [27] Tim Kraska, Alex Beutel, Ed H. Chi, Jeffrey Dean, and Neoklis Polyzotis. The case for learned index structures. In *Proceedings of the 2018 International Conference on Management of Data*, 2018.
- [28] Walid Krichene, Maximilian Balandat, Claire Tomlin, and Alexandre Bayen. The hedge algorithm on a continuum. In *Proceedings of the 32nd International Conference on Machine Learning*, 2015.
- [29] Ravi Kumar, Manish Purohit, and Zoya Svitkina. Improving online algorithms via ML predictions. In *Advances in Neural Information Processing Systems*, 2018.
- [30] Silvio Lattanzi, Thomas Lavastida, Benjamin Moseley, and Sergei Vassilvitskii. Online scheduling via learned weights. In *Proceedings of the 2020 ACM-SIAM Symposium on Discrete Algorithms*, 2020.
- [31] Jeffrey Li, Mikhail Khodak, Sebastian Caldas, and Ameet Talwalkar. Differentially private meta-learning. In *Proceedings of the 8th International Conference on Learning Representations*, 2020.
- [32] Sen Lin, Mehmet Dedeoglu, and Junshan Zhang. Accelerating distributed online meta-learning via multi-agent collaboration under limited communication. In *Proceedings of the Twenty-second International Symposium on Theory, Algorithmic Foundations, and Protocol Design for Mobile Networks and Mobile Computing*, 2021.
- [33] Alexander Lindermayr and Nicole Megow. Permutation predictions for non-clairvoyant scheduling. In *Proceedings of the 34th ACM Symposium on Parallelism in Algorithms and Architectures*, 2022.
- [34] Thodoris Lykouris and Sergei Vassilvitskii. Competitive caching with machine learned advice. *Journal of the ACM*, 68(4), 2021.

- [35] Mohammad Mahdian, Hamid Nazerzadeh, and Amin Saberi. Online optimization with uncertain information. *ACM Transactions on Algorithms*, 8:1–29, 2012.
- [36] Michael Mitzenmacher and Sergei Vassilvitskii. Algorithms with predictions. In Tim Roughgarden, editor, *Beyond the Worst-Case Analysis of Algorithms*. Cambridge University Press, Cambridge, UK, 2021.
- [37] Aryan Mokhtari, Shahin Shahrampour, Ali Jadbabaie, and Alejandro Ribeiro. Online optimization in dynamic environments: Improved regret rates for strongly convex problems. In *Proceedings of the 55th IEEE Conference on Decision and Control*, 2016.
- [38] Francesco Orabona and David Pal. Coin betting and parameter-free online learning. In *Advances in Neural Information Processing Systems*, 2016.
- [39] Alexander Rakhlin and Karthik Sridharan. Online learning with predictable sequences. In *Proceedings of the 26th Annual Conference on Learning Theory*, 2013.
- [40] Alexander Rakhlin and Karthik Sridharan. Efficient online multiclass prediction on graphs via surrogate losses. In *Proceedings of the 20th International Conference on Artificial Intelligence and Statistics*, 2017.
- [41] Dhruv Rohatgi. Near-optimal bounds for online caching with machine learned advice. In *Proceedings of the 2020 ACM-SIAM Symposium on Discrete Algorithms*, 2020.
- [42] Timothy Roughgarden. *Beyond Worst-Case Analysis of Algorithms*. Cambridge University Press, 2020.
- [43] Ziv Scully, Isaac Grosf, and Michael Mitzenmacher. Uniform bounds for scheduling with job size estimates. In *Proceedings of the 13th Innovations in Theoretical Computer Science Conference*, 2022.
- [44] Shai Shalev-Shwartz. Online learning and online convex optimization. *Foundations and Trends in Machine Learning*, 4(2):107–194, 2011.
- [45] Daniel A. Spielman and Shang-Hua Teng. Smoothed analysis of algorithms: Why the simplex algorithm usually takes polynomial time. *Journal of the ACM*, 51(3):385–463, 2004.
- [46] Martin Zinkevich. Online convex programming and generalized infinitesimal gradient ascent. In *Proceedings of the 20th International Conference on Machine Learning*, 2003.

## Checklist

1. For all authors...
  - (a) Do the main claims made in the abstract and introduction accurately reflect the paper's contributions and scope? [Yes]
  - (b) Did you describe the limitations of your work? [Yes]
  - (c) Did you discuss any potential negative societal impacts of your work? [N/A]
  - (d) Have you read the ethics review guidelines and ensured that your paper conforms to them? [Yes]
2. If you are including theoretical results...
  - (a) Did you state the full set of assumptions of all theoretical results? [Yes] Assumptions stated in Sections 3, 4, 6, and the Appendix.
  - (b) Did you include complete proofs of all theoretical results? [Yes] Proofs given in Sections 3, 4, and the Appendix.
3. If you ran experiments...
  - (a) Did you include the code, data, and instructions needed to reproduce the main experimental results (either in the supplemental material or as a URL)? [N/A]
  - (b) Did you specify all the training details (e.g., data splits, hyperparameters, how they were chosen)? [N/A]
  - (c) Did you report error bars (e.g., with respect to the random seed after running experiments multiple times)? [N/A]
  - (d) Did you include the total amount of compute and the type of resources used (e.g., type of GPUs, internal cluster, or cloud provider)? [N/A]
4. If you are using existing assets (e.g., code, data, models) or curating/releasing new assets...
  - (a) If your work uses existing assets, did you cite the creators? [N/A]
  - (b) Did you mention the license of the assets? [N/A]
  - (c) Did you include any new assets either in the supplemental material or as a URL? [N/A]
  - (d) Did you discuss whether and how consent was obtained from people whose data you're using/curating? [N/A]
  - (e) Did you discuss whether the data you are using/curating contains personally identifiable information or offensive content? [N/A]
5. If you used crowdsourcing or conducted research with human subjects...
  - (a) Did you include the full text of instructions given to participants and screenshots, if applicable? [N/A]
  - (b) Did you describe any potential participant risks, with links to Institutional Review Board (IRB) approvals, if applicable? [N/A]
  - (c) Did you include the estimated hourly wage paid to participants and the total amount spent on participant compensation? [N/A]

## A Proofs of main results

### A.1 Proof of Lemma 4.1

*Proof.* For each  $j \in [n]$  define  $p_j = 1 - \langle \mathbf{s}_{[j]}, \mathbf{p}_{[j]} \rangle$ , i.e. the probability that  $\hat{s}_j \neq s_j$ , and the r.v.  $X_j \sim \text{Ber}(p_j)$ . Define also the r.v.  $S_i = \sum_{j=i}^{i+\gamma D-1} X_j$ , s.t. we have

$$\gamma D \mathbb{E}_{\mathbf{p}} q = \mathbb{E}_{\mathbf{p}} \max_{i \in [n-\gamma D+1]} S_i = \mathbb{E}_{\mathbf{p}} \max_{i \in [n-\gamma D+1]} \sum_{j=i}^{i+\gamma D-1} X_j$$

Note that  $S_i$  is a Poisson binomial and so has moment-generating function  $\mathbb{E}_{\mathbf{p}} \exp(tS_i) = \prod_{j=i}^{i+\gamma D-1} (1 - p_j + p_j e^t)$ . Therefore applying Jensen's inequality and the union bound yields

$$\begin{aligned} \exp\left(t \mathbb{E}_{\mathbf{p}} \max_{i \in [n-\gamma D+1]} S_i\right) &\leq \mathbb{E}_{\mathbf{p}} \exp\left(t \max_{i \in [n-\gamma D+1]} S_i\right) = \mathbb{E}_{\mathbf{p}} \max_{i \in [n-\gamma D+1]} \exp(tS_i) \\ &\leq \sum_{i=1}^{n-\gamma D+1} \mathbb{E}_{\mathbf{p}} \exp(tS_i) \\ &\leq (n - \gamma D + 1) \prod_{j=i^*}^{i^*+\gamma D-1} (1 - p_j + p_j e^t) \end{aligned}$$

for all  $t > 0$  and  $i^* \in \arg \max_{i \in [n-\gamma D+1]} \mathbb{E}_{\mathbf{p}} S_i$ . We then have

$$\begin{aligned} t \mathbb{E}_{\mathbf{p}} \max_{i \in [n-\gamma D+1]} S_i &\leq \log(n - \gamma D + 1) + \sum_{j=i^*}^{i^*+\gamma D-1} \log(1 - p_j + p_j e^t) \\ &\leq \log(n - \gamma D + 1) + \sum_{j=i^*}^{i^*+\gamma D-1} \log \exp(p_j (e^t - 1)) \\ &\leq \log(n - \gamma D + 1) + \sum_{j=i^*}^{i^*+\gamma D-1} p_j (e^t - 1) \\ &\leq \log(n - \gamma D + 1) + \mathbb{E}_{\mathbf{p}} S_{i^*} (e^t - 1) \end{aligned}$$

Dividing by  $t = W \left( \frac{\log(n-\gamma D+1)}{x} \right) + 1$  shows that  $f(x) = \frac{x(\exp(t)-1) + \log(n-\gamma D+1)}{t\gamma D}$ , where  $W : [0, \infty) \mapsto [0, \infty)$  is the Lambert  $W$ -function. Define  $L = \log(n - \gamma D + 1)/e$ , so we are interested in bounding  $f(x) = \frac{x(\exp(W(L/x)+1)-1) + eL}{W(L/x)+1}$ . We compute its derivative:

$$f'(x) = \frac{x(\exp(W(L/x)+1)-1)W(L/x)^2 - 3x(W(L/x)+1/3) + x \exp(W(L/x)+1) + 2eL}{x(W(L/x)+1)^3}$$

and second derivative:

$$f''(x) = -\frac{W(L/x) \left( (x + eL)W(L/x)^2 + 2(2x + eL)W(L/x) + eL \right)}{x^2(W(L/x)+1)^5}$$

Since the second derivative is always negative,  $f$  is a concave function on  $x \geq 0$ . Thus for  $\omega = W(1)$  we have

$$\begin{aligned} f(x) &\leq \min_{y>0} f(y) + f'(y)(x - y) \\ &\leq \frac{L(e/\omega - 1 + e)}{\omega + 1} + \frac{L(e/\omega - 1)\omega^2 - 3L(\omega + 1/3) + Le/\omega + 2eL}{L(\omega + 1)^3} (x - L) \\ &= (e/\omega + 1/(\omega + 1)^3 - (e + 1)/(\omega + 1) - 1/(\omega + 1)^2) x \\ &\quad + (1/(\omega + 1)^2 + e/(\omega + 1) - 1/(\omega + 1)^3) L \\ &< ex + \frac{2}{e} \log(n - \gamma D + 1) \end{aligned}$$

□

## A.2 Proof of Corollary 6.1

*Proof.* We have that  $U_t(\lambda)$  is bounded above by  $3(1 + 2B)$ , its largest gradient is attained at  $2/(3 + 2\eta_t/n)$  where it is bounded by  $(3 + 2B)/2$ . Applying Krichene et al. [28, Corollary 2] and simplifying yields the result.  $\square$

## A.3 Proof of Corollary 6.2

*Proof.*  $U_t(x, \lambda)$  is bounded above by  $2N$  and its largest gradient is attained at  $\lambda = \frac{\min\{b_t, n_t\}}{u_t(x)} \geq \frac{1}{N}$  with norm bounded by  $\frac{B \exp(1/N)}{(\exp(1/N) - 1)^2}$ . Let  $\Lambda = \{k\delta\}_{k=1}^{\lfloor 1/\delta \rfloor}$  for some  $\delta \in (0, 1]$ . Then we run EG on the simplex over  $[N] \times \Lambda$  and with step-size  $\frac{1}{2N} \sqrt{\frac{\log \frac{N}{\delta}}{2T}}$  to obtain regret compared to the best element of  $[N] \times \Lambda$  of  $2N \sqrt{2T \log \frac{N}{\delta}}$  [44, Theorem 2.15]. Setting  $\delta = \min \left\{ \frac{N(\exp(1/N) - 1)^2}{B \exp(1/N)} \sqrt{\frac{2}{T}}, 1 \right\}$  yields

$$\begin{aligned} \mathbb{E} \sum_{t=1}^T U_t(x_t, \lambda_t) &\leq 2N \sqrt{2T \log(N \lfloor 1/\delta \rfloor)} + \min_{x \in [N], \lambda \in \Lambda} \sum_{t=1}^T U_t(x, \lambda) \\ &\leq 2N \sqrt{2T \log \frac{N}{\delta}} + \frac{B \exp(1/N) \delta T}{(\exp(1/N) - 1)^2} + \min_{x \in [N], \lambda \in (0, 1]} \sum_{t=1}^T U_t(x, \lambda) \\ &\leq 2N \sqrt{2T \left( \log(BT) + \max \left\{ \log N, \frac{1}{N} - 2 \log \left( \exp \left( \frac{1}{N} \right) - 1 \right) \right\} \right)} \\ &\quad + N \sqrt{2T} + \min_{x \in [N], \lambda \in (0, 1]} \sum_{t=1}^T U_t(x, \lambda) \\ &\leq 6N \sqrt{T \log(BNT)} + \min_{x \in [N], \lambda \in (0, 1]} \sum_{t=1}^T U_t(x, \lambda) \end{aligned}$$

$\square$

## A.4 Proof of Corollary 6.4

*Proof.*  $U_t(x, \lambda)$  is bounded above by  $e(N + B)$ , its largest gradient w.r.t.  $\lambda$  is attained at  $\lambda = \frac{e \min\{n_t, b_t\}}{(e-1)u_t(x) + e \min\{n_t, b_t\}}$ , where it is bounded by  $\left( \frac{2e(N+B)}{e-1} \right)^2$ , and its largest gradient w.r.t.  $x$  is  $e(N + B)$ . Thus the function is  $5e(N + B)^2$ -Lipschitz w.r.t. the Euclidean norm, apart from discontinuities at  $x = n_t$ . Now, note that our assumption that the points  $n_1, \dots, n_T$  are  $\beta$ -dispersed implies exactly that the functions  $U_t$  are  $\beta$ -dispersed (c.f. Balcan et al. [9, Definition 2.1]), so the exponentially-weighted forecaster attains expected regret  $\tilde{O} \left( \sqrt{T \log(NT)} + (N + B)^2 T^{1-\beta} \right)$ .  $\square$

## A.5 Online-to-batch conversion

**Lemma A.1.** *Suppose an online learner has regret bound  $R_T$  on a sequence of convex losses  $\ell_{\mathbf{y}_1}, \dots, \ell_{\mathbf{y}_T} : \mathcal{X} \mapsto [0, B]$  whose data  $\mathbf{y}_t$  are drawn i.i.d. from some distribution  $\mathcal{D}$ . If  $\mathbf{x}_1, \dots, \mathbf{x}_T$  are the actions of the online learner,  $\hat{\mathbf{x}} = \frac{1}{T} \sum_{t=1}^T \mathbf{x}_t$  is their average, and  $T = \Omega \left( T_\varepsilon + \frac{B^2}{\varepsilon^2} \log \frac{1}{\delta} \right)$  for  $T_\varepsilon = \min_{2R_{T'} \leq \varepsilon T'} T'$ , then w.p.  $\geq 1 - \delta$  we have  $\mathbb{E}_{\mathbf{y} \sim \mathcal{D}} \ell_{\mathbf{y}}(\hat{\mathbf{x}}) \leq \min_{\mathbf{x} \in \mathcal{X}} \mathbb{E}_{\mathbf{y} \sim \mathcal{D}} \ell_{\mathbf{y}}(\mathbf{x}) + \varepsilon$ .*

*Proof.* Apply Jensen's inequality, [12, Proposition 1], the regret bound, and Hoeffding's bound:

$$\begin{aligned} \mathbb{E}_{\mathbf{y}} \ell_{\mathbf{y}}(\hat{\mathbf{x}}) &\leq \frac{1}{T} \sum_{t=1}^T \mathbb{E}_{\mathbf{y}} \ell_{\mathbf{y}}(\mathbf{x}_t) \leq \frac{1}{T} \sum_{t=1}^T \ell_{\mathbf{y}_t}(\mathbf{x}_t) + B \sqrt{\frac{2}{T} \log \frac{2}{\delta}} \leq \min_{\mathbf{x} \in \mathcal{X}} \frac{1}{T} \sum_{t=1}^T \ell_{\mathbf{y}_t}(\mathbf{x}) + \frac{R_T}{T} + B \sqrt{\frac{2}{T} \log \frac{2}{\delta}} \\ &\leq \min_{\mathbf{x} \in \mathcal{X}} \mathbb{E}_{\mathbf{y}} \ell_{\mathbf{y}}(\mathbf{x}) + \frac{R_T}{T} + 2B \sqrt{\frac{2}{T} \log \frac{2}{\delta}} \end{aligned} \quad (1)$$

$\square$



## B b-matching

**Definition B.1.** For  $\mathbf{b} \in \mathbb{R}_{\geq 0}^n$  the **b-seminorm**  $\|\cdot\|_{\mathbf{b},1} : \mathbb{R}^n \mapsto \mathbb{R}_{\geq 0}$  is  $\|\mathbf{x}\|_{\mathbf{b},1} = \sum_{i=1}^n \mathbf{b}_{[i]} |\mathbf{x}_{[i]}|$ .

**Claim B.1.** Given any vectors  $\mathbf{x} \in \mathbb{Z}^n$  and  $\mathbf{y} \in \mathbb{R}^n$ , let  $\tilde{\mathbf{y}} \in \mathbb{Z}^n$  be the vector whose elements are those of  $\mathbf{y}$  rounded to the nearest integer. Then for all  $\mathbf{b} \in \mathbb{Z}^n$  we have  $\|\mathbf{x} - \tilde{\mathbf{y}}\|_{\mathbf{b},1} \leq 2\|\mathbf{x} - \mathbf{y}\|_{\mathbf{b},1}$ .

*Proof.* Let  $S \subset [n]$  be the set of indices  $i \in [n]$  for which  $\mathbf{x}_{[i]} \geq \mathbf{y}_{[i]} \iff \tilde{\mathbf{y}}_{[i]} = \lceil \mathbf{y}_{[i]} \rceil$ . For  $i \in [n] \setminus S$  we have  $|\mathbf{x}_{[i]} - \mathbf{y}_{[i]}| \geq 1/2 \geq |\tilde{\mathbf{y}}_{[i]} - \mathbf{y}_{[i]}|$  so it follows by the triangle inequality that

$$\begin{aligned} \|\mathbf{x} - \tilde{\mathbf{y}}\|_{\mathbf{b},1} &= \sum_{i \in S} \mathbf{b}_{[i]} |\mathbf{x}_{[i]} - \tilde{\mathbf{y}}_{[i]}| + \sum_{i \in [n] \setminus S} \mathbf{b}_{[i]} |\mathbf{x}_{[i]} - \tilde{\mathbf{y}}_{[i]}| \\ &\leq \sum_{i \in S} \mathbf{b}_{[i]} |\mathbf{x}_{[i]} - \mathbf{y}_{[i]}| + \sum_{i \in [n] \setminus S} \mathbf{b}_{[i]} (|\mathbf{x}_{[i]} - \mathbf{y}_{[i]}| + |\mathbf{y}_{[i]} - \tilde{\mathbf{y}}_{[i]}|) \\ &\leq \sum_{i \in S} \mathbf{b}_{[i]} |\mathbf{x}_{[i]} - \mathbf{y}_{[i]}| + 2 \sum_{i \in [n] \setminus S} \mathbf{b}_{[i]} |\mathbf{x}_{[i]} - \mathbf{y}_{[i]}| \leq 2\|\mathbf{x} - \mathbf{y}\|_{\mathbf{b},1} \end{aligned}$$

□

**Theorem B.2.** Suppose we have a fixed graph with  $n \geq 3$  vertices and  $m \geq 1$  edges.

1. For any cost vector  $\mathbf{c} \in \mathbb{Z}_{\geq 0}^m$ , any demand vector  $\mathbf{b} \in \mathbb{Z}_{\geq 0}^n$ , and any dual vector  $\mathbf{x} \in \mathbb{R}^n$  there exists an algorithm for minimum weight perfect **b**-matching that runs in time  $\tilde{O}(mnU(\mathbf{x}))$ , where  $U(\mathbf{x}) = \|\mathbf{x} - \mathbf{x}^*(\mathbf{c}, \mathbf{b})\|_{\mathbf{b},1}$  for  $\mathbf{x}^*(\mathbf{c}, \mathbf{b})$  the optimal dual vector associated with  $\mathbf{c}$  and  $\mathbf{b}$ .
2. There exists a poly-time algorithm s.t. for any  $\delta, \varepsilon > 0$  and any distribution  $\mathcal{D}$  over (cost, demand) vector pairs in  $\mathbb{Z}_{\geq 0}^m \times \mathbb{Z}_{\geq 0}^n$  with respective  $\ell_\infty$ -norms bounded by  $C$  and  $B$  the algorithm takes  $\mathcal{O}\left(\left(\frac{CBn}{\varepsilon}\right)^2 \log \frac{1}{\delta}\right)$  samples from  $\mathcal{D}$  and returns  $\hat{\mathbf{x}}$  s.t. w.p.  $\geq 1 - \delta$ :

$$\mathbb{E}_{(\mathbf{c}, \mathbf{b}) \sim \mathcal{D}} \|\hat{\mathbf{x}} - \mathbf{x}^*(\mathbf{c}, \mathbf{b})\|_{\mathbf{b},1} \leq \min_{\|\mathbf{x}\|_\infty \leq C} \mathbb{E}_{(\mathbf{c}, \mathbf{b}) \sim \mathcal{D}} \|\mathbf{x} - \mathbf{x}^*(\mathbf{c}, \mathbf{b})\|_{\mathbf{b},1} + \varepsilon$$

3. Let  $(\mathbf{c}_1, \mathbf{b}_1), \dots, (\mathbf{c}_T, \mathbf{b}_T) \in \mathbb{Z}_{\geq 0}^m \times \mathbb{Z}_{\geq 0}^n$  be an adversarial sequence of (cost, demand) vector pairs with  $\ell_\infty$ -norms bounded by  $C$  and  $B$ , respectively. Then OGD with appropriate step-size has regret

$$\max_{\|\mathbf{x}\|_\infty \leq C} \sum_{t=1}^T \|\mathbf{x}_t - \mathbf{x}^*(\mathbf{c}_t, \mathbf{b}_t)\|_{\mathbf{b}_t,1} - \|\mathbf{x} - \mathbf{x}^*(\mathbf{c}_t, \mathbf{b}_t)\|_{\mathbf{b}_t,1} \leq CBn\sqrt{2T}$$

*Proof.* The first result follows by Dinitz et al. [16, Theorem 31] and Claim B.1. For the third, let  $\mathbf{x}_t$  be the sequence generated by running OGD [46] with step size  $\frac{C}{B\sqrt{2T}}$  on the losses  $U_t(\mathbf{x}) = \|\mathbf{x} - \mathbf{x}^*(\mathbf{c}_t, \mathbf{b}_t)\|_{\mathbf{b}_t,1}$  over domain  $[-C, C]^n$ . Since these losses are  $B\sqrt{n}$ -Lipschitz and the duals are  $C\sqrt{n}$ -bounded in Euclidean norm the regret guarantee follows from Shalev-Shwartz [44, Corollary 2.7]. For the second result, apply online-to-batch conversion to the third result, i.e. draw  $T = \Omega\left(\left(\frac{CBn}{\varepsilon}\right)^2 \log \frac{1}{\delta}\right)$  samples  $(\mathbf{c}_t, \mathbf{b}_t)$ , run OGD as above on the resulting losses  $U_t$ , and set  $\hat{\mathbf{x}} = \frac{1}{T} \sum_{t=1}^T \mathbf{x}_t$  to be the average of the resulting predictions  $\mathbf{x}_t$ . Applying Lemma A.1 yields the result. □

## C Learning linear predictors with instance-feature inputs

Computational instances on which we want to run algorithms with predictions often come with instance-specific features, e.g. ones derived from text descriptions of the instance or summary statistics about related graphs or environments [27, 30]. It is thus natural to learn parameterized functions, e.g. linear mappings or neural networks, from these features to predictions. However, there has been very little work, in either the statistical or online setting, showing that such predictions are learnable. In this section we show how our framework naturally handles this setting by exploiting the convexity of compositions of convex and affine functions, resulting in the first formal guarantees for linear predictors for algorithms with predictions. While the first application to the matching problem of Dinitz et al. [16] is a straightforward extension, we also show how to handle more complicated cases, such as when the output space is constrained to probability simplices as in the page migration problem. Note we assume all feature vectors lie in the  $f$ -dimensional simplex; this is generally easy to accomplish by normalization. For simplicity we also only consider learning the linear transform from features to predictors and not the intercept, as the latter follows from the former by appending an extra dimension with value  $1/2$  to the feature vector and doubling the bound on the norm of the linear transform.

### C.1 b-matching

Our first application for learning mappings from instance features is to the **b**-matching setting. Note that the learning-theoretic results for the regular bipartite matching setting in Section 3 follow directly by setting  $\mathbf{b} = \mathbf{1}_n$  for all instances, and that the learning-theoretic results of Theorems 3.1 and B.2 are also special cases of the following when  $\mathbf{f} = \mathbf{1}_1$  for all instances. Note that we optimize only over  $\mathbf{A} \in [-C, C]^{n \times f}$ , but unlike in the  $f = 1$  case the optimal  $\mathbf{A}$  may be unbounded; to handle that setting, one could again use an algorithm such as KT-OCO that does not depend on knowing the set size [38].

**Theorem C.1.** *Consider the setting of Theorem B.2.*

1. *There exists a poly-time algorithm s.t. for any  $\delta, \varepsilon > 0$  and any distribution  $\mathcal{D}$  over (cost, demand, feature) vector triples in  $\mathbb{Z}_{\geq 0}^m \times \mathbb{Z}_{\geq 0}^n \times \Delta_f$  s.t. the respective  $\ell_\infty$ -norms of the first two are bounded by  $C$  and  $B$ , respectively, the algorithm takes  $\mathcal{O}\left(\left(\frac{CBn}{\varepsilon}\right)^2 (f^2 + \log \frac{1}{\delta})\right)$  samples from  $\mathcal{D}$  and returns  $\hat{\mathbf{A}} \in \mathbb{R}^{n \times f}$  s.t. w.p.  $\geq 1 - \delta$ :*

$$\mathbb{E}_{(\mathbf{c}, \mathbf{b}, \mathbf{f}) \sim \mathcal{D}} \|\hat{\mathbf{A}}\mathbf{f} - \mathbf{x}^*(\mathbf{c}, \mathbf{b})\|_{\mathbf{b}, 1} \leq \min_{\|\mathbf{A}\|_{\max} \leq C} \mathbb{E}_{(\mathbf{c}, \mathbf{b}, \mathbf{f}) \sim \mathcal{D}} \|\mathbf{A}\mathbf{x} - \mathbf{x}^*(\mathbf{c}, \mathbf{b})\|_{\mathbf{b}, 1} + \varepsilon$$

2. *Let  $(\mathbf{c}_1, \mathbf{b}_1, \mathbf{f}_1), \dots, (\mathbf{c}_T, \mathbf{b}_T, \mathbf{f}_T) \in \mathbb{Z}_{\geq 0}^m \times \mathbb{Z}_{\geq 0}^n \times \Delta_f$  be an adversarial sequence of (cost, demand, feature) vector triples s.t. the  $\ell_\infty$ -norms of the first two are bounded by  $C$  and  $B$ , respectively. Then OGD with appropriate step-size has regret*

$$\max_{\|\mathbf{A}\|_{\max} \leq C} \sum_{t=1}^T \|\mathbf{A}_t \mathbf{f}_t - \mathbf{x}^*(\mathbf{c}_t, \mathbf{b}_t)\|_{\mathbf{b}_t, 1} - \|\mathbf{A} \mathbf{f}_t - \mathbf{x}^*(\mathbf{c}_t, \mathbf{b}_t)\|_{\mathbf{b}_t, 1} \leq CBnf\sqrt{2T}$$

*Proof.* For the second result let  $\mathbf{A}_t$  be generated by running OGD with step-size  $\frac{C}{B\sqrt{2T}}$  on the losses  $U_t(\mathbf{A}\mathbf{f}) = \|\mathbf{A}\mathbf{f} - \mathbf{x}^*(\mathbf{c}_t, \mathbf{b}_t)\|_{\mathbf{b}_t, 1}$  over  $[-C, C]^{n \times f}$ . Since these are  $B\sqrt{nf}$ -Lipschitz and the duals are  $C\sqrt{nf}$ -bounded in the Euclidean norm, the regret follows from Shalev-Shwartz [44, Corollary 2.7]. For the first result, apply online-to-batch conversion to the second result, i.e. draw  $T = \Omega\left(\left(\frac{CBn}{\varepsilon}\right)^2 (f^2 + \log \frac{1}{\delta})\right)$  samples  $(\mathbf{c}_t, \mathbf{b}_t, \mathbf{f}_t)$ , run OGD as above on the resulting losses  $U_t$ , and set  $\hat{\mathbf{A}} = \frac{1}{T} \sum_{t=1}^T \mathbf{A}_t$  to be the average of the resulting predictions  $\mathbf{A}_t$ . Applying Lemma A.1 yields the result.  $\square$

### C.2 Online page migration

Using instance features for online page migration is more involved because the output space must be constrained to the product of  $n$   $|\mathcal{K}|$ -dimensional simplices. However, we can solve this by restricting to tensors consisting of matrices whose columns sum to one, also known as rectangular stochastic matrices. Note that the learning-theoretic results of Theorem 4.2 are special cases of the following when  $\mathbf{f} = \mathbf{1}_1$  for all instances.

**Theorem C.2.** *In the setting of Theorem 4.2 let  $\mathbb{S}^{n \times |\mathcal{K}| \times f}$  be the set of stacks of  $|\mathcal{K}| \times f$  nonnegative matrices whose columns have unit  $\ell_1$ -norm.*

1. *There exists a poly-time algorithm s.t. for any  $\delta, \varepsilon > 0$  and distribution  $\mathcal{D}$  over request sequences  $s$  of length  $n$  in  $\mathcal{K}$  and associated feature vectors  $\mathbf{f} \in \Delta_f$  it takes  $\mathcal{O}\left(\left(\frac{\gamma D}{\varepsilon}\right)^2 (n^2 f^2 \log |\mathcal{K}| + \log \frac{1}{\delta})\right)$  samples from  $\mathcal{D}$  and returns  $\hat{\mathbf{A}}$  s.t. w.p.  $\geq 1 - \delta$ :*

$$\mathbb{E}_{(s, \mathbf{f}) \sim \mathcal{D}} U_s(\hat{\mathbf{A}} \mathbf{f}) \leq \min_{\mathbf{A} \in \mathbb{S}^{n \times |\mathcal{K}| \times f}} \mathbb{E}_{(s, \mathbf{f}) \sim \mathcal{D}} U_s(\mathbf{A} \mathbf{f}) + \varepsilon$$

2. *Let  $(s_1, \mathbf{f}_1), \dots, (s_T, \mathbf{f}_T)$  be an adversarial sequence of (request sequence, feature) pairs. Then updating the distribution  $\mathbf{A}_{t[j, k]}$  over  $\Delta_{|\mathcal{K}|}$  at each (timestep, column) pair  $(j, k) \in [n] \times [f]$  using EG with appropriate step-size has regret*

$$\max_{\mathbf{A} \in \mathbb{S}^{n \times |\mathcal{K}| \times f}} \sum_{t=1}^T U_{s_t}(\mathbf{A}_t \mathbf{f}_t) - U_{s_t}(\mathbf{A} \mathbf{f}_t) \leq \gamma D n f \sqrt{2T \log |\mathcal{K}|}$$

*Proof.* For the second result let  $\mathbf{A}_t$  be the sequence generated by running  $n f$  EG algorithms with step size  $\sqrt{\frac{\log |\mathcal{K}|}{2\gamma^2 D^2 T}}$  on the losses  $U_{s_t}(\mathbf{A} \mathbf{f})$  over  $\mathbb{S}^{n \times |\mathcal{K}| \times f}$ . Since these losses are  $\gamma D$ -Lipschitz and the maximum entropy over the simplex is  $\log |\mathcal{K}|$ , the regret guarantee follows from [44, Theorem 2.15]. For the first result, apply standard online-to-batch conversion to the second result, i.e. draw  $T = \Omega\left(\left(\frac{\gamma D}{\varepsilon}\right)^2 (n^2 f^2 \log |\mathcal{K}| + \log \frac{1}{\delta})\right)$  samples  $(s_t, \mathbf{f}_t)$ , run EG on the resulting losses  $U_{s_t}(\mathbf{A} \mathbf{f}_t)$  as above, and set  $\hat{\mathbf{A}} = \frac{1}{T} \sum_{t=1}^T \mathbf{A}_t$  to be the average of the resulting actions  $\mathbf{A}_t$ . Applying Lemma A.1 yields the result.  $\square$

We can further also show a result in the perhaps more-natural setting where the linear predictor  $\mathbf{A}$  is the same for each element in the sequence, and maps directly from features to the  $|\mathcal{K}|$ -simplex. Notably, the linear auto-regressive setting, in which we want a linear map from the past  $k$  sequence elements to a probabilistic prediction of the next one, is covered by this result if we allow the features to be  $k|\mathcal{K}|$ -dimensional concatenations of  $k$  one-hot  $|\mathcal{K}|$ -length vectors.

**Theorem C.3.** *In the setting of Theorem 4.2 let  $\mathbb{S}^{a \times b}$  be the set of  $a \times b$  nonnegative matrices whose columns have unit  $\ell_1$ -norm.*

1. *There exists a poly-time algorithm s.t. for any  $\delta, \varepsilon > 0$  and distribution  $\mathcal{D}$  over request sequences  $s$  of length  $n$  in  $\mathcal{K}$  and associated feature sequence  $\mathbf{F}^T \in \mathbb{S}^{f \times n}$  it takes  $\mathcal{O}\left(\left(\frac{\gamma D}{\varepsilon}\right)^2 (n^2 f^2 \log |\mathcal{K}| + \log \frac{1}{\delta})\right)$  samples from  $\mathcal{D}$  and returns  $\hat{\mathbf{A}}$  s.t. w.p.  $\geq 1 - \delta$ :*

$$\mathbb{E}_{(s, \mathbf{F}) \sim \mathcal{D}} U_s(\mathbf{F} \hat{\mathbf{A}}^T) \leq \min_{\mathbf{A} \in \mathbb{S}^{|\mathcal{K}| \times f}} \mathbb{E}_{(s, \mathbf{F}) \sim \mathcal{D}} U_s(\mathbf{F} \mathbf{A}^T) + \varepsilon$$

2. *Let  $(s_1, \mathbf{F}_1), \dots, (s_T, \mathbf{F}_T)$  be an adversarial sequence of (request sequence, feature sequence) pairs. Then updating the distribution  $\mathbf{A}_{t[k]}$  over  $\Delta_{|\mathcal{K}|}$  at each column  $k \in [f]$  has regret*

$$\max_{\mathbf{A} \in \mathbb{S}^{|\mathcal{K}| \times f}} \sum_{t=1}^T U_{s_t}(\mathbf{F}_t \mathbf{A}_t^T) - U_{s_t}(\mathbf{F}_t \mathbf{A}^T) \leq \gamma D f \sqrt{2T \log |\mathcal{K}|}$$

*Proof.* For the second result let  $\mathbf{A}_t$  be the sequence generated by running  $f$  EG algorithms with step size  $\sqrt{\frac{\log |\mathcal{K}|}{2\gamma^2 D^2 T}}$  on the losses  $U_{s_t}(\mathbf{F} \mathbf{A}^T)$  over  $\mathbb{S}^{|\mathcal{K}| \times f}$ . Since these losses are  $\gamma D$ -Lipschitz and the maximum entropy over the simplex is  $\log |\mathcal{K}|$ , the regret guarantee follows from [44, Theorem 2.15]. For the first result, apply standard online-to-batch conversion to the second result, i.e. draw  $T = \Omega\left(\left(\frac{\gamma D}{\varepsilon}\right)^2 (f^2 \log |\mathcal{K}| + \log \frac{1}{\delta})\right)$  samples  $(s_t, \mathbf{f}_t)$ , run EG on the resulting losses  $U_{s_t}(\mathbf{F}_t \mathbf{A}^T)$  as above, and set  $\hat{\mathbf{A}} = \frac{1}{T} \sum_{t=1}^T \mathbf{A}_t$  to be the average of the resulting actions  $\mathbf{A}_t$ . Applying Lemma A.1 yields the result.  $\square$

## D Faster graph algorithms with predictions

In this section we compare to the results of Chen et al. [13], who analyze several prediction-based graph algorithms, including one with an improved prediction-dependent runtime for the matching approach of Dinitz et al. [16] and a prediction-dependent bound for single-source shortest path. From the learnability perspective, they observe two important error metrics in the analysis of graph algorithms with predictions: the  $\ell_1$ -metric of Dinitz et al. [16] measuring the  $\ell_1$ -norm between the prediction and a ground truth vector such as the dual and the  $\ell_\infty$ -metric measuring the  $\ell_\infty$ -norm between the same quantities. In the first case their setting and results are equivalent to those of Dinitz et al. [16], so we improve upon this by a factor of  $\mathcal{O}(d)$ , where  $d$  is the dimension of the hint.

To analyze the  $\ell_\infty$  case, we start by showing that—as in the  $\ell_1$  case—we can round integer vectors with only a multiplicative factor loss:

**Claim D.1.** *Given any vectors  $\mathbf{x} \in \mathbb{Z}^n$  and  $\mathbf{y} \in \mathbb{R}^n$ , let  $\tilde{\mathbf{y}} \in \mathbb{Z}^n$  be the vector whose elements are those of  $\mathbf{y}$  rounded to the nearest integer. Then we have  $\|\mathbf{x} - \tilde{\mathbf{y}}\|_\infty \leq 2\|\mathbf{x} - \mathbf{y}\|_\infty$ .*

*Proof.* Let  $S \subset [n]$  be the set of indices  $i \in [n]$  for which  $\mathbf{x}_{[i]} \geq \mathbf{y}_{[i]} \iff \tilde{\mathbf{y}}_{[i]} = \lceil \mathbf{y}_{[i]} \rceil$ . For  $i \in [n] \setminus S$  we have  $|\mathbf{x}_{[i]} - \mathbf{y}_{[i]}| \geq 1/2 \geq |\tilde{\mathbf{y}}_{[i]} - \mathbf{y}_{[i]}|$  so it follows by the triangle inequality that

$$\begin{aligned} \|\mathbf{x} - \tilde{\mathbf{y}}\|_\infty &= \max \left\{ \max_{i \in S} |\mathbf{x}_{[i]} - \tilde{\mathbf{y}}_{[i]}|, \max_{i \in [n] \setminus S} |\mathbf{x}_{[i]} - \tilde{\mathbf{y}}_{[i]}| \right\} \\ &\leq \max \left\{ \max_{i \in S} |\mathbf{x}_{[i]} - \mathbf{y}_{[i]}|, \max_{i \in [n] \setminus S} |\mathbf{x}_{[i]} - \mathbf{y}_{[i]}| + |\mathbf{y}_{[i]} - \tilde{\mathbf{y}}_{[i]}| \right\} \\ &\leq \max \left\{ \max_{i \in S} |\mathbf{x}_{[i]} - \mathbf{y}_{[i]}|, 2 \max_{i \in [n] \setminus S} |\mathbf{x}_{[i]} - \mathbf{y}_{[i]}| \right\} \leq 2\|\mathbf{x} - \mathbf{y}\|_\infty \end{aligned}$$

□

We are thus able to also use online convex optimization in this setting and apply the rounded outputs to graph algorithms. In particular, we can use regular OGD to improve upon the  $\ell_\infty$ -learnability result of Chen et al. [13] by a factor of  $\mathcal{O}(d^2)$ , where  $d$  is the dimension of the prediction:

**Theorem D.1.** *Consider any graph algorithm with optimal  $d$ -dimensional  $M$ -bounded predictions  $\mathbf{h}(c)$  associated with every instance  $c$ .*

1. *There exists a poly-time algorithm s.t. for any  $\delta, \varepsilon > 0$  and distribution  $\mathcal{D}$  over instances it takes  $\mathcal{O}\left(\left(\frac{M}{\varepsilon}\right)^2 \left(d + \log \frac{1}{\delta}\right)\right)$  samples from  $\mathcal{D}$  and returns  $\hat{\mathbf{h}} \in \mathbb{R}^d$  s.t. w.p.  $\geq 1 - \delta$*

$$\mathbb{E}_{c \sim \mathcal{D}} \|\hat{\mathbf{h}} - \mathbf{h}(c)\|_\infty \leq \min_{\|\mathbf{h}\|_\infty \leq M} \mathbb{E}_{c \sim \mathcal{D}} \|\mathbf{h} - \mathbf{h}(c)\|_\infty + \varepsilon$$

2. *Let  $c_1, \dots, c_T$  be an adversarial sequence of instances. Then OGD with appropriate step-size achieves regret*

$$\max_{\|\mathbf{h}\|_\infty \leq M} \sum_{t=1}^T \|\mathbf{h}_t - \mathbf{h}(c_t)\|_\infty - \|\mathbf{h} - \mathbf{h}(c_t)\|_\infty \leq M\sqrt{2dT}$$

*Proof.* The proof is the same as for the last two results of Theorem 5.1 in the special case  $f = 1$ . □

## E Permutation predictions for non-clairvoyant scheduling

Finally, we discuss the applicability of our framework to the results in Lindermayr and Megow [33], who study how to prioritize among  $n$  jobs by predicting the best permutation of them under weights  $\mathbf{w} \in \mathbb{R}_{\geq 0}^n$  and processing requirements  $\mathbf{p} \in \mathbb{R}_{> 0}^n$  that are only known after completion. Ignoring robustness-consistency tradeoffs and terms that do not depend on the prediction, they show that in several settings the competitive ratio depends linearly on the following error of an  $n \times n$  permutation matrix  $\mathbf{X}$ :

$$U_{\mathbf{w}, \mathbf{p}}(\mathbf{X}) = \text{Tr}(\mathbf{X}\mathbf{w}((\mathbf{U} \odot \mathbf{X})\mathbf{p})^T) = \text{Tr}((\mathbf{U} \odot \mathbf{X})^T \mathbf{X}\mathbf{w}\mathbf{p}^T)$$

where  $\mathbf{U} \in \{0, 1\}^{n \times n}$  is upper triangular. The above expression is derived from the third equation in the proof of Theorem 4.1 of Lindermayr and Megow [33] for the case of  $z = 1$  sample; we construct the matrix form to reason about its online learnability.

Naively, a sequence of bounded functions of permutations is *computationally inefficiently* learnable by using randomized EG over the  $n!$  experts corresponding to each permutation:

**Theorem E.1.** *Consider the setting of Lindermayr and Megow [33] with  $n$  jobs with  $W$ -bounded weights and  $P$ -bounded processing times. Let  $\mathbb{P}^{n \times n}$  be the set of  $n \times n$  permutation matrices.*

1. *There exists an algorithm that s.t. for any  $\delta, \varepsilon > 0$  and distribution  $\mathcal{D}$  over weights and processing requirements it takes  $\mathcal{O}\left(\left(\frac{WPn}{\varepsilon}\right)^2 (n \log n + \log \frac{1}{\delta})\right)$  samples from  $\mathcal{D}$  and returns a discrete distribution  $\hat{\mathbf{x}} \in \Delta_{n!}$  over  $\mathbb{P}^{n \times n}$  such that*

$$\mathbb{E}_{\mathbf{X} \sim \hat{\mathbf{x}}} \mathbb{E}_{(\mathbf{w}, \mathbf{p}) \sim \mathcal{D}} U_{\mathbf{w}, \mathbf{p}}(\mathbf{X}) \leq \min_{\mathbf{X} \in \mathbb{P}^{n \times n}} \mathbb{E}_{(\mathbf{w}, \mathbf{p}) \sim \mathcal{D}} U_{\mathbf{w}, \mathbf{p}}(\mathbf{X}) + \varepsilon$$

2. *Let  $(\mathbf{w}_1, \mathbf{p}_1), \dots, (\mathbf{w}_T, \mathbf{p}_T)$  be an adversarial sequence of job (weight, processing requirement) pairs. Then running EG with appropriate step-size over  $\Delta_{|\mathbb{P}^{n \times n}|}$  has regret*

$$\mathbb{E} \max_{\mathbf{X} \in \mathbb{P}^{n \times n}} \sum_{t=1}^T U_{\mathbf{w}_t, \mathbf{p}_t}(\mathbf{X}_t) - U_{\mathbf{w}_t, \mathbf{p}_t}(\mathbf{X}) \leq WPn \sqrt{2nT \log n}$$

where the expectation is over the randomness of the algorithm.

*Proof.* For the second result let  $\mathbf{x}_t \in \Delta_{n!}$  be the sequence generated by running EG with step-size  $\sqrt{\frac{\log(n!)}{2T}}$  over the  $n!$  experts corresponding to each element of  $\mathbb{P}^{n \times n}$ . Then the sequence of permutation matrices  $\mathbf{X}_t \sim \mathbf{x}_t$  sampled from this distribution satisfies the guarantee on the expected regret [44, Corollary 2.14] since  $\log(n!) \leq n \log n$  and  $U_{\mathbf{w}, \mathbf{p}}$  is  $WPn$ -bounded. The first result follows by applying online-to-batch conversion to this sequence, i.e. we draw  $T = \Omega\left(\left(\frac{WPn}{\varepsilon}\right)^2 (n \log n + \log \frac{1}{\delta})\right)$  samples  $(\mathbf{w}_t, \mathbf{p}_t)$ , run randomized EG as above, and set  $\hat{\mathbf{x}} = \frac{1}{T} \sum_{t=1}^T \mathbf{x}_t$  to be the average of the resulting distributions  $\mathbf{x}_t$ . Applying Lemma A.1 yields the result.  $\square$

The sample complexity guarantee resulting from online-to-batch conversion matches that of Lindermayr and Megow [33], except that the output is a distribution over permutation matrices so the error is in expectation over that distribution. However, randomized EG is incredibly inefficient due to the need to store and sample from a distribution over  $n!$  variables. Another way of learning over permutation matrices is to run an online learning algorithm over the set of doubly stochastic matrices [21]. When the losses are linear functions of the permutation matrices this yields efficient low-regret algorithms because each doubly stochastic matrix corresponds to a *small* convex combination of permutation matrices, i.e. a distribution from which one can sample an action. However, the losses  $U_{\mathbf{w}, \mathbf{p}}$  are nonlinear and so a different approach is needed.
